# Supplementary material for: Schizophrenia interactome: fully-labeled interactome network
Source: PubMed Central journal article supplement (PMC5007984; doi:10.1038/npjschz.2016.25), 2016-08-24

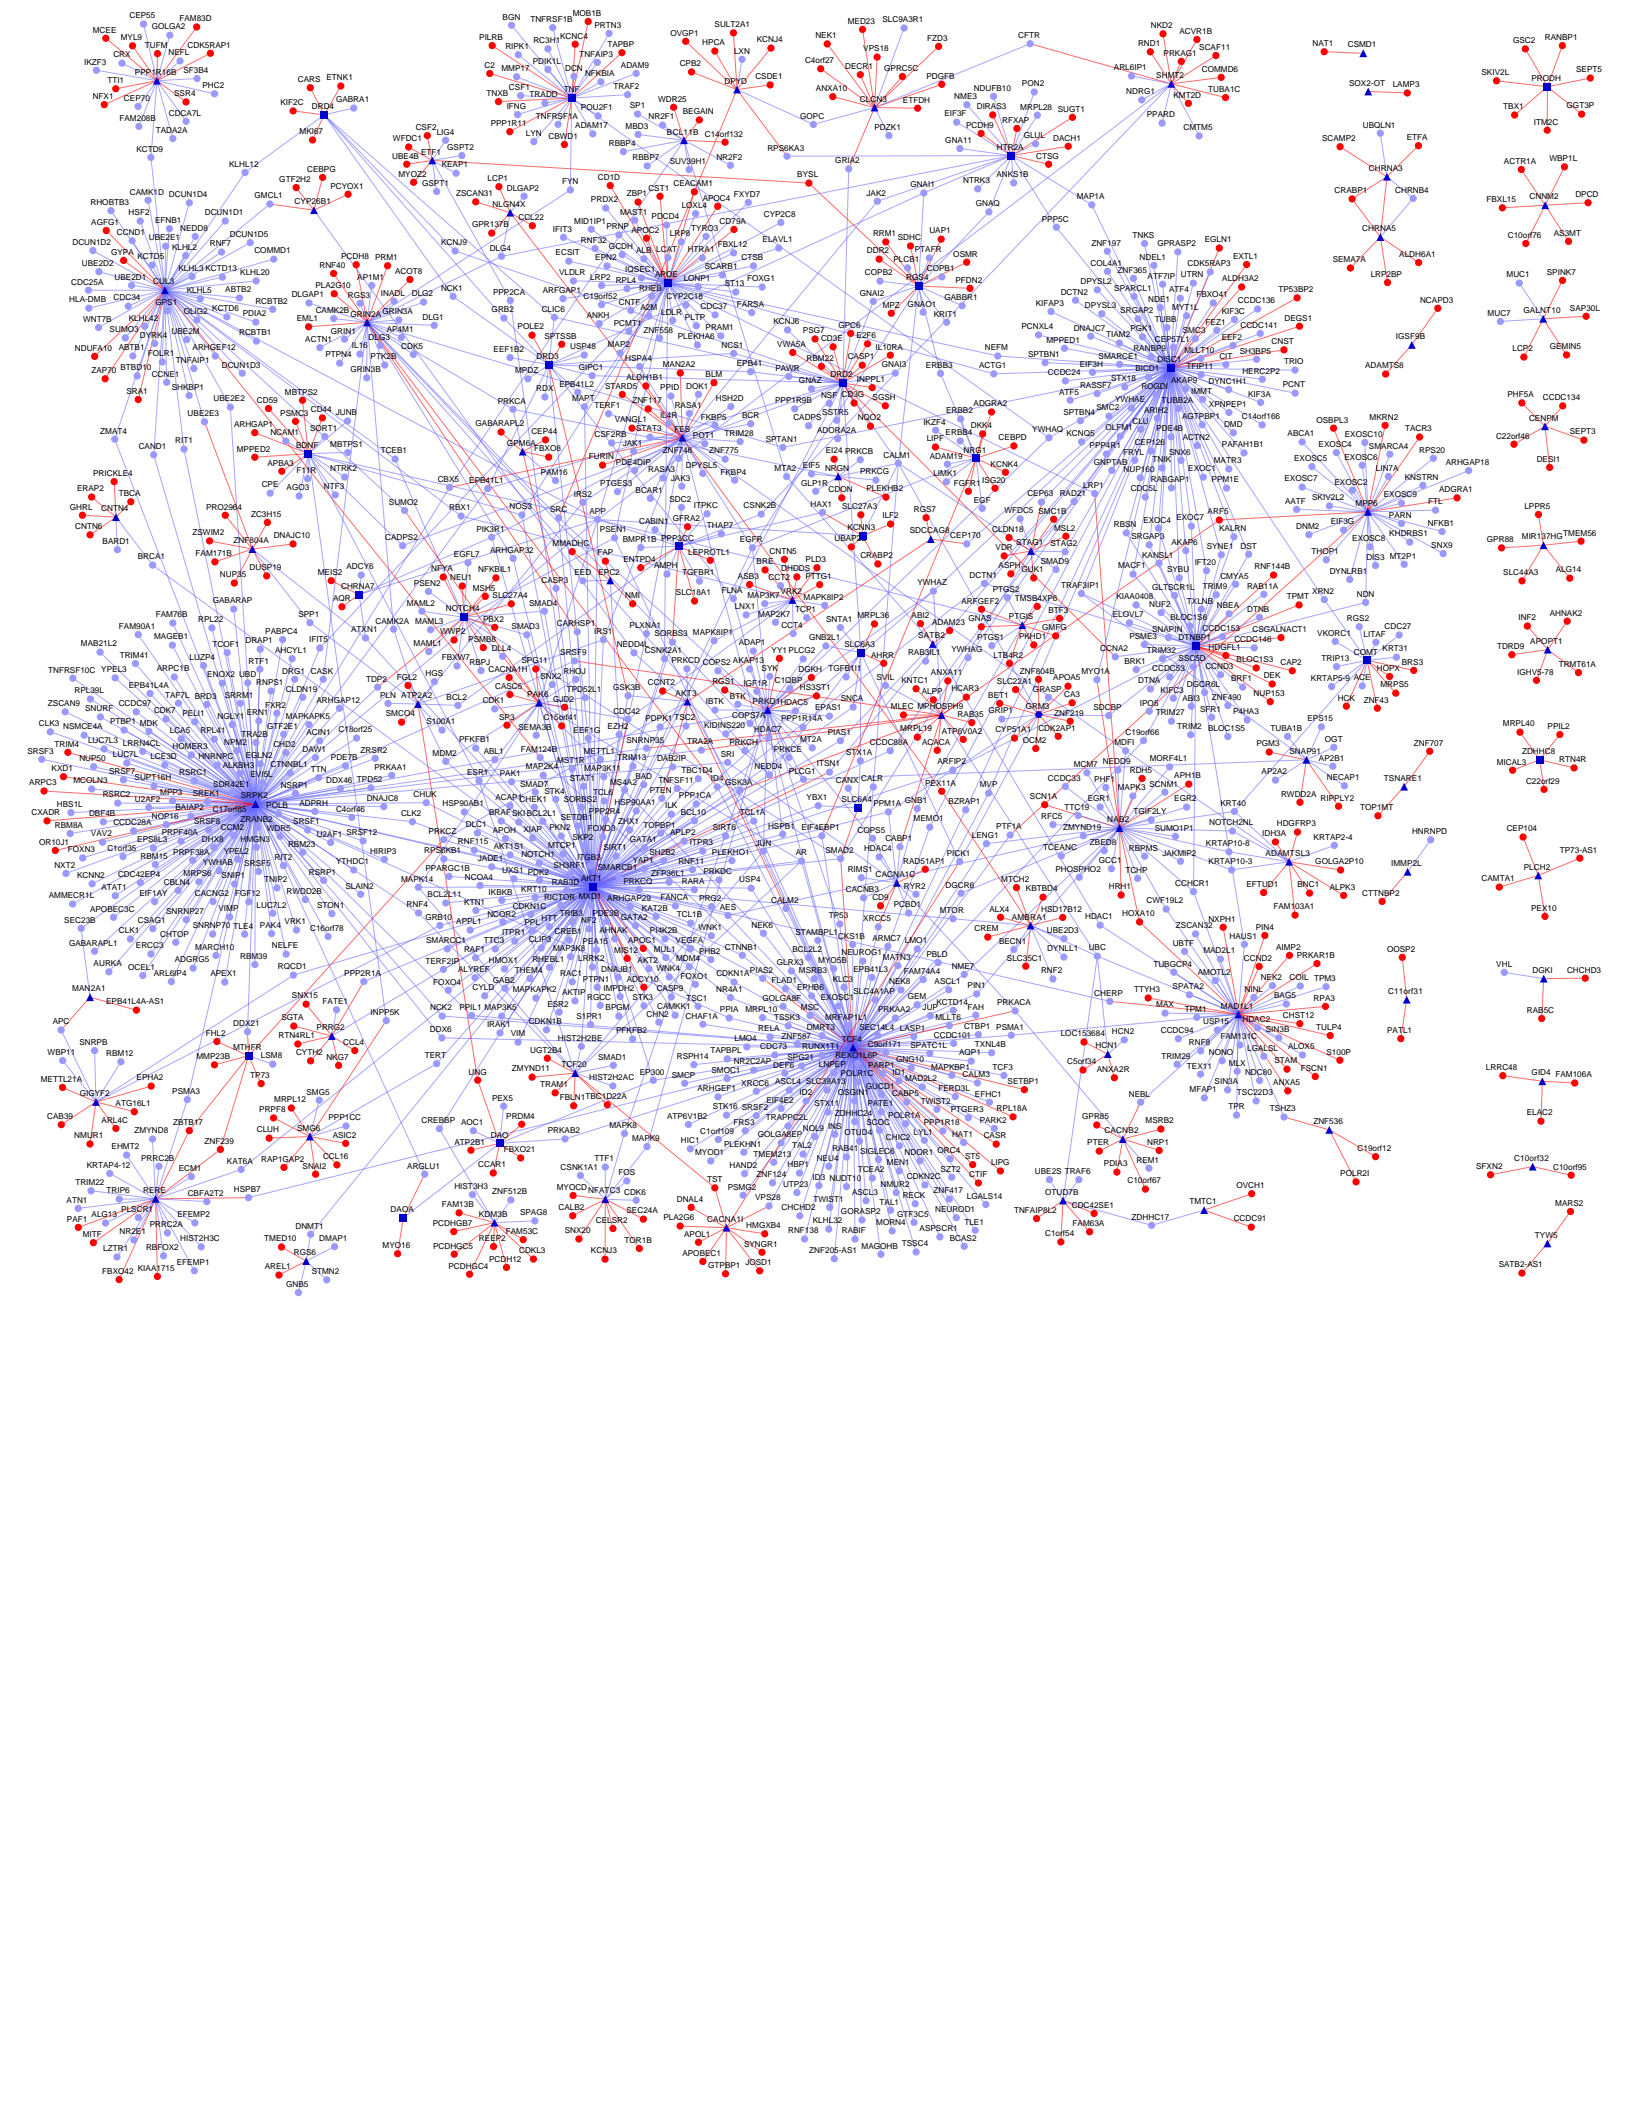

Supplement: npjschz201625-s1.pdf [file npjschz201625-s1.pdf]
