# Supplementary material for: Schizophrenia interactome: fully-labeled interactome network
Source: PubMed Central journal article supplement (PMC5007984; doi:10.1038/npjschz.2016.25), 2016-08-24
Supplement: npjschz201625-s2.pdf [file npjschz201625-s2.pdf]

## Schizophrenia Interactome

Ganapathiraju et al, npj Schizophrenia, 2 (16012) 2016. (doi:10.1038/npjSchz.2016.12)

| Gene 1   | Gene 2    | Interaction |
|----------|-----------|-------------|
| ABI2     | SATB2     | Novel       |
| ACACA    | MPHOSPH9  | Novel       |
| ACOT8    | GRIN2A    | Novel       |
| ACTR1A   | CNNM2     | Novel       |
| ACVR1B   | SHMT2     | Novel       |
| ADAM23   | SATB2     | Novel       |
| ADAMTS8  | IGSF9B    | Novel       |
| ADAMTSL3 | ALPK3     | Novel       |
| ADAMTSL3 | BNC1      | Novel       |
| ADAMTSL3 | EFTUD1    | Novel       |
| ADAMTSL3 | FAM103A1  | Novel       |
| ADAMTSL3 | GOLGA2P10 | Novel       |
| ADAMTSL3 | HDGFRP3   | Novel       |
| ADAMTSL3 | IDH3A     | Novel       |
| ADCY10   | AKT1      | Novel       |
| ADGRA1   | MPP6      | Novel       |
| ADGRA2   | NRG1      | Novel       |
| AGFG1    | CUL3      | Novel       |
| AHNAK2   | APOPT1    | Novel       |
| AHRR     | SLC6A3    | Novel       |
| AIMP2    | MAD1L1    | Novel       |
| AKT1     | APOC1     | Novel       |
| AKT1     | CDC42     | Novel       |
| AKT1     | ITSN1     | Novel       |
| AKT1     | MIS12     | Novel       |
| AKT3     | CALM2     | Novel       |
| AKT3     | CCNT2     | Novel       |
| AKT3     | PTEN      | Novel       |
| AKT3     | SDCCAG8   | Novel       |
| ALDH1B1  | FES       | Novel       |
| ALDH3A2  | DISC1     | Novel       |
| ALDH6A1  | CHRNA5    | Novel       |
| ALG14    | MIR137HG  | Novel       |
| ALPP     | MPHOSPH9  | Novel       |
| ALX4     | AMBRA1    | Novel       |
| AMBRA1   | CREM      | Novel       |
| AMBRA1   | HSD17B12  | Novel       |
| AMBRA1   | KBTBD4    | Novel       |
| AMBRA1   | MTCH2     | Novel       |
| AMBRA1   | PEX11A    | Novel       |
| AMBRA1   | SLC35C1   | Novel       |
| ANXA10   | CLCN3     | Novel       |
| ANXA11   | MPHOSPH9  | Novel       |
| ANXA2R   | HCN1      | Novel       |

| Gene          | Interactor |
|---------------|------------|
| ADAMTSL3      | Candidate  |
| AKT1          | Candidate  |
| AKT3          | Candidate  |
| AMBRA1        | Candidate  |
| APOE          | Candidate  |
| APOPT1        | Candidate  |
| ATP2A2        | Candidate  |
| BCL11B        | Candidate  |
| BDNF          | Candidate  |
| C10orf32      | Candidate  |
| C10orf32-ASMT | Candidate  |
| C11orf31      | Candidate  |
| C3orf49       | Candidate  |
| CACNA1C       | Candidate  |
| CACNA1I       | Candidate  |
| CACNB2        | Candidate  |
| CENPM         | Candidate  |
| CHRNA3        | Candidate  |
| CHRNA5        | Candidate  |
| CHRNA7        | Candidate  |
| CLCN3         | Candidate  |
| CNNM2         | Candidate  |
| CNTN4         | Candidate  |
| COMT          | Candidate  |
| CSMD1         | Candidate  |
| CUL3          | Candidate  |
| CYP26B1       | Candidate  |
| DAO           | Candidate  |
| DAOA          | Candidate  |
| DGKI          | Candidate  |
| DISC1         | Candidate  |
| DPYD          | Candidate  |
| DRD2          | Candidate  |
| DRD3          | Candidate  |
| DRD4          | Candidate  |
| DTNBP1        | Candidate  |
| EP300-AS1     | Candidate  |
| EPC2          | Candidate  |
| ETF1          | Candidate  |
| FES           | Candidate  |
| FLJ45743      | Candidate  |
| GALNT10       | Candidate  |
| GID4          | Candidate  |
| GIGYF2        | Candidate  |

|          |           |       |
|----------|-----------|-------|
| ANXA5    | MAD1L1    | Novel |
| APBA3    | BDNF      | Novel |
| APC      | MAN2A1    | Novel |
| APH1B    | NAB2      | Novel |
| APOA5    | GRM3      | Novel |
| APOBEC1  | CACNA1I   | Novel |
| APOC2    | APOE      | Novel |
| APOC4    | APOE      | Novel |
| APOE     | CD1D      | Novel |
| APOE     | CD79A     | Novel |
| APOE     | CEACAM1   | Novel |
| APOE     | CST1      | Novel |
| APOE     | ZBP1      | Novel |
| APOL1    | CACNA1I   | Novel |
| APOPT1   | IGHV5-78  | Novel |
| APOPT1   | INF2      | Novel |
| APOPT1   | TDRD9     | Novel |
| APOPT1   | TRMT61A   | Novel |
| AQR      | CHRNA7    | Novel |
| AREL1    | RGS6      | Novel |
| ARF5     | MPHOSPH9  | Novel |
| ARF5     | MPP6      | Novel |
| ARFGEF2  | PTGIS     | Novel |
| ARGLU1   | DAOA      | Novel |
| ARHGAP1  | BDNF      | Novel |
| ARL4C    | GIGYF2    | Novel |
| ARPC3    | SRPK2     | Novel |
| AS3MT    | CNNM2     | Novel |
| ASB3     | VRK2      | Novel |
| ASIC2    | SMG6      | Novel |
| ASPH     | STAG1     | Novel |
| ATG16L1  | GIGYF2    | Novel |
| ATP2A2   | FGL2      | Novel |
| ATP2A2   | SMCO4     | Novel |
| ATP2A2   | UNG       | Novel |
| ATP2B1   | DAO       | Novel |
| ATP6V0A2 | MPHOSPH9  | Novel |
| BCL11B   | BEGAIN    | Novel |
| BCL11B   | C14orf132 | Novel |
| BCL11B   | WDR25     | Novel |
| BDNF     | CD44      | Novel |
| BDNF     | CD59      | Novel |
| BDNF     | MBTPS2    | Novel |
| BDNF     | MPPED2    | Novel |
| BDNF     | PSMC3     | Novel |
| BET1     | GRM3      | Novel |
| BLM      | FES       | Novel |

|              |           |
|--------------|-----------|
| GPM6A        | Candidate |
| GRAMD1B      | Candidate |
| GRIN2A       | Candidate |
| GRM3         | Candidate |
| HCN1         | Candidate |
| HTR2A        | Candidate |
| IGSF9B       | Candidate |
| IMMP2L       | Candidate |
| KCNN3        | Candidate |
| KDM3B        | Candidate |
| LINC0147     | Candidate |
| LOC100507431 | Candidate |
| MAD1L1       | Candidate |
| MAN2A1       | Candidate |
| MIR137HG     | Candidate |
| MPHOSPH9     | Candidate |
| MPP6         | Candidate |
| MTHFR        | Candidate |
| NAB2         | Candidate |
| NFATC3       | Candidate |
| NLGN4X       | Candidate |
| NOTCH4       | Candidate |
| NRG1         | Candidate |
| NRGN         | Candidate |
| OTUD7B       | Candidate |
| PAK6         | Candidate |
| PLCH2        | Candidate |
| PPP1R16B     | Candidate |
| PPP3CC       | Candidate |
| PRKD1        | Candidate |
| PRODH        | Candidate |
| PRRG2        | Candidate |
| PTGIS        | Candidate |
| RERE         | Candidate |
| RGS4         | Candidate |
| RGS6         | Candidate |
| SATB2        | Candidate |
| SDCCAG8      | Candidate |
| SHMT2        | Candidate |
| SLC6A3       | Candidate |
| SLC6A4       | Candidate |
| SMG6         | Candidate |
| SNAP91       | Candidate |
| SOX2-OT      | Candidate |
| SRPK2        | Candidate |
| STAG1        | Candidate |
| TCF20        | Candidate |

|          |          |       |
|----------|----------|-------|
| BLOC1S3  | DTNBP1   | Novel |
| BRE      | VRK2     | Novel |
| BRS3     | COMT     | Novel |
| BTF3     | PTGIS    | Novel |
| BYSL     | ETF1     | Novel |
| BYSL     | RGS4     | Novel |
| C10orf32 | C10orf95 | Novel |
| C10orf32 | SFXN2    | Novel |
| C10orf67 | CACNB2   | Novel |
| C10orf76 | CNNM2    | Novel |
| C11orf31 | OOSP2    | Novel |
| C11orf31 | PATL1    | Novel |
| C15orf41 | PAK6     | Novel |
| C19orf12 | ZNF536   | Novel |
| C1orf54  | OTUD7B   | Novel |
| C2       | TNF      | Novel |
| C22orf29 | ZDHHC8   | Novel |
| C22orf46 | CENPM    | Novel |
| C4orf27  | CLCN3    | Novel |
| C5orf34  | HCN1     | Novel |
| CA3      | GRM3     | Novel |
| CAB39    | GIGYF2   | Novel |
| CABP1    | MPHOSPH9 | Novel |
| CACNA1C  | CD9      | Novel |
| CACNA1C  | RAD51AP1 | Novel |
| CACNA1C  | XRCC5    | Novel |
| CACNA1H  | PAK6     | Novel |
| CACNA1I  | DNAL4    | Novel |
| CACNA1I  | GTPBP1   | Novel |
| CACNA1I  | HMGXB4   | Novel |
| CACNA1I  | JOSD1    | Novel |
| CACNA1I  | PICK1    | Novel |
| CACNA1I  | PLA2G6   | Novel |
| CACNA1I  | SYNGR1   | Novel |
| CACNA1I  | TST      | Novel |
| CACNA1I  | VPS28    | Novel |
| CACNB2   | GPR85    | Novel |
| CACNB2   | MSRB2    | Novel |
| CACNB2   | NEBL     | Novel |
| CACNB2   | NRP1     | Novel |
| CACNB2   | PDIA3    | Novel |
| CACNB2   | PTER     | Novel |
| CALB2    | NFATC3   | Novel |
| CAMTA1   | PLCH2    | Novel |
| CAP2     | DTNBP1   | Novel |
| CARHSP1  | GRIN2A   | Novel |
| CARS     | DRD4     | Novel |

|             |           |
|-------------|-----------|
| TCF4        | Candidate |
| TMTC1       | Candidate |
| TMX2-CTNND1 | Candidate |
| TNF         | Candidate |
| TSNARE1     | Candidate |
| TYW5        | Candidate |
| VRK2        | Candidate |
| ZDHHC8      | Candidate |
| ZNF536      | Candidate |
| ZNF804A     | Candidate |
| ABI2        | Novel     |
| ACACA       | Novel     |
| ACOT8       | Novel     |
| ACTR1A      | Novel     |
| ACVR1B      | Novel     |
| ADAM23      | Novel     |
| ADAMTS8     | Novel     |
| ADCY10      | Novel     |
| ADGRA1      | Novel     |
| ADGRA2      | Novel     |
| AGFG1       | Novel     |
| AHNAK2      | Novel     |
| AHRR        | Novel     |
| AIMP2       | Novel     |
| ALDH1B1     | Novel     |
| ALDH3A2     | Novel     |
| ALDH6A1     | Novel     |
| ALG14       | Novel     |
| ALPK3       | Novel     |
| ALPP        | Novel     |
| ALX4        | Novel     |
| ANXA10      | Novel     |
| ANXA11      | Novel     |
| ANXA2R      | Novel     |
| ANXA5       | Novel     |
| APBA3       | Novel     |
| APH1B       | Novel     |
| APOA5       | Novel     |
| APOBEC1     | Novel     |
| APOC1       | Novel     |
| APOC2       | Novel     |
| APOC4       | Novel     |
| APOL1       | Novel     |
| AQR         | Novel     |
| AREL1       | Novel     |
| ARF5        | Novel     |
| ARFGEF2     | Novel     |

|          |          |       |
|----------|----------|-------|
| CASC5    | PAK6     | Novel |
| CASP1    | DRD2     | Novel |
| CASP3    | GPM6A    | Novel |
| CASR     | TCF4     | Novel |
| CBWD1    | TNF      | Novel |
| CBX5     | FES      | Novel |
| CCAR1    | DAO      | Novel |
| CCDC134  | CENPM    | Novel |
| CCDC91   | TMTC1    | Novel |
| CCL16    | SMG6     | Novel |
| CCL22    | NLGN4X   | Novel |
| CCL4     | PRRG2    | Novel |
| CCNA2    | DRD2     | Novel |
| CCND2    | MAD1L1   | Novel |
| CD3E     | DRD2     | Novel |
| CD3G     | DRD2     | Novel |
| CDC42SE1 | OTUD7B   | Novel |
| CDK2AP1  | GRM3     | Novel |
| CDK5RAP1 | PPP1R16B | Novel |
| CDKL3    | KDM3B    | Novel |
| CDON     | NRGN     | Novel |
| CEBPD    | NRG1     | Novel |
| CEBPG    | CYP26B1  | Novel |
| CELSR2   | NFATC3   | Novel |
| CENPM    | SEPT3    | Novel |
| CENPM    | DESI1    | Novel |
| CENPM    | PHF5A    | Novel |
| CEP104   | PLCH2    | Novel |
| CEP170   | SDCCAG8  | Novel |
| CEP44    | GPM6A    | Novel |
| CEP63    | STAG1    | Novel |
| CFTR     | SHMT2    | Novel |
| CHCHD3   | DGKI     | Novel |
| CHERP    | MAD1L1   | Novel |
| CHRNA3   | CHRNA5   | Novel |
| CHRNA3   | CRABP1   | Novel |
| CHRNA3   | ETFA     | Novel |
| CHRNA3   | SCAMP2   | Novel |
| CHRNA5   | CRABP1   | Novel |
| CHRNA5   | LRP2BP   | Novel |
| CHRNA5   | SEMA7A   | Novel |
| CHRNA7   | MEIS2    | Novel |
| CHST12   | MAD1L1   | Novel |
| CLCN3    | DECR1    | Novel |
| CLCN3    | ETFDH    | Novel |
| CLCN3    | FZD3     | Novel |
| CLCN3    | GPRC5C   | Novel |

|           |       |
|-----------|-------|
| ARHGAP1   | Novel |
| ARL4C     | Novel |
| ARPC3     | Novel |
| AS3MT     | Novel |
| ASB3      | Novel |
| ASIC2     | Novel |
| ASPH      | Novel |
| ATG16L1   | Novel |
| ATP2B1    | Novel |
| ATP6V0A2  | Novel |
| BEGAIN    | Novel |
| BET1      | Novel |
| BLM       | Novel |
| BLOC1S3   | Novel |
| BNC1      | Novel |
| BRE       | Novel |
| BRS3      | Novel |
| BTF3      | Novel |
| BYSL      | Novel |
| C10orf67  | Novel |
| C10orf76  | Novel |
| C10orf95  | Novel |
| C14orf132 | Novel |
| C15orf41  | Novel |
| C19orf12  | Novel |
| C1orf54   | Novel |
| C2        | Novel |
| C22orf29  | Novel |
| C22orf46  | Novel |
| C4orf27   | Novel |
| C5orf34   | Novel |
| CA3       | Novel |
| CAB39     | Novel |
| CACNA1H   | Novel |
| CALB2     | Novel |
| CAMTA1    | Novel |
| CAP2      | Novel |
| CARS      | Novel |
| CASC5     | Novel |
| CASP1     | Novel |
| CASR      | Novel |
| CBWD1     | Novel |
| CCAR1     | Novel |
| CCDC134   | Novel |
| CCDC91    | Novel |
| CCL16     | Novel |
| CCL22     | Novel |

|            |          |       |
|------------|----------|-------|
| CLCN3      | GRIA2    | Novel |
| CLCN3      | MED23    | Novel |
| CLCN3      | NEK1     | Novel |
| CLCN3      | PDGFB    | Novel |
| CLCN3      | VPS18    | Novel |
| CLDN18     | STAG1    | Novel |
| CLUH       | SMG6     | Novel |
| CNNM2      | DPCD     | Novel |
| CNNM2      | FBXL15   | Novel |
| CNNM2      | WBP1L    | Novel |
| CNST       | DISC1    | Novel |
| CNTN4      | CNTN6    | Novel |
| CNTN4      | ERAP2    | Novel |
| CNTN4      | GHRL     | Novel |
| CNTN4      | PRICKLE4 | Novel |
| CNTN4      | TBCA     | Novel |
| CNTN5      | VRK2     | Novel |
| COMMD6     | SHMT2    | Novel |
| COMT       | HCK      | Novel |
| COMT       | HOPX     | Novel |
| COMT       | MRPS5    | Novel |
| COMT       | ZNF43    | Novel |
| CPB2       | DPYD     | Novel |
| CRABP2     | KCNN3    | Novel |
| CSDE1      | DPYD     | Novel |
| CSF2       | ETF1     | Novel |
| CSGALNACT1 | DTNBP1   | Novel |
| CSMD1      | NAT1     | Novel |
| CTIF       | TCF4     | Novel |
| CTSG       | HTR2A    | Novel |
| CTTNBP2    | IMMP2L   | Novel |
| CUL3       | FAM124B  | Novel |
| CUL3       | GYPA     | Novel |
| CUL3       | NDUFA10  | Novel |
| CUL3       | SRA1     | Novel |
| CUL3       | ZAP70    | Novel |
| CXADR      | SRPK2    | Novel |
| CYP26B1    | GMCL1    | Novel |
| CYP26B1    | GTF2H2   | Novel |
| CYP26B1    | PCYOX1   | Novel |
| CYP51A1    | GRM3     | Novel |
| CYTH2      | PRRG2    | Novel |
| DACH1      | HTR2A    | Novel |
| DAO        | FBXO21   | Novel |
| DAO        | PRDM4    | Novel |
| DAO        | UNG      | Novel |
| DAOA       | MYO16    | Novel |

|            |       |
|------------|-------|
| CCL4       | Novel |
| CCND2      | Novel |
| CCNT2      | Novel |
| CD1D       | Novel |
| CD3E       | Novel |
| CD3G       | Novel |
| CD44       | Novel |
| CD59       | Novel |
| CD79A      | Novel |
| CD9        | Novel |
| CDC42SE1   | Novel |
| CDK2AP1    | Novel |
| CDK5RAP1   | Novel |
| CDKL3      | Novel |
| CDON       | Novel |
| CEACAM1    | Novel |
| CEBPD      | Novel |
| CEBPG      | Novel |
| CELSR2     | Novel |
| CEP104     | Novel |
| CEP44      | Novel |
| CHCHD3     | Novel |
| CHST12     | Novel |
| CLDN18     | Novel |
| CLUH       | Novel |
| CNST       | Novel |
| CNTN5      | Novel |
| CNTN6      | Novel |
| COMMD6     | Novel |
| CPB2       | Novel |
| CRABP1     | Novel |
| CRABP2     | Novel |
| CREM       | Novel |
| CSDE1      | Novel |
| CSF2       | Novel |
| CSGALNACT1 | Novel |
| CST1       | Novel |
| CTIF       | Novel |
| CTSG       | Novel |
| CTTNBP2    | Novel |
| CXADR      | Novel |
| CYP51A1    | Novel |
| CYTH2      | Novel |
| DACH1      | Novel |
| DDR2       | Novel |
| DECR1      | Novel |
| DEGS1      | Novel |

|              |         |       |
|--------------|---------|-------|
| DDR2         | RGS4    | Novel |
| DDX21        | MTHFR   | Novel |
| DEGS1        | DISC1   | Novel |
| DEK          | DTNBP1  | Novel |
| DGKH         | PRKD1   | Novel |
| DGKI         | RAB5C   | Novel |
| DHDDS        | VRK2    | Novel |
| DIRAS3       | HTR2A   | Novel |
| DISC1        | EGLN1   | Novel |
| DISC1        | EXTL1   | Novel |
| DISC1        | TP53BP2 | Novel |
| DKK4         | NRG1    | Novel |
| DLL4         | PAK6    | Novel |
| DNAJC10      | ZNF804A | Novel |
| DPYD         | HPCA    | Novel |
| DPYD         | KCNJ4   | Novel |
| DPYD         | OVGP1   | Novel |
| DPYD         | RPS6KA3 | Novel |
| DPYD         | SRC     | Novel |
| DPYD         | SULT2A1 | Novel |
| DRD2         | E2F6    | Novel |
| DRD2         | GPC6    | Novel |
| DRD2         | IL10RA  | Novel |
| DRD2         | INPPL1  | Novel |
| DRD2         | NQO2    | Novel |
| DRD2         | PSG7    | Novel |
| DRD2         | RBM22   | Novel |
| DRD2         | SGSH    | Novel |
| DRD2         | VWA5A   | Novel |
| DRD3         | GSK3B   | Novel |
| DRD3         | POLE2   | Novel |
| DRD3         | SPTSSB  | Novel |
| DRD4         | ETNK1   | Novel |
| DRD4         | KIF2C   | Novel |
| DRD4         | MKI67   | Novel |
| DTNBP1       | HDGFL1  | Novel |
| DTNBP1       | NUP153  | Novel |
| DTNBP1       | RNF144B | Novel |
| DTNBP1       | TPMT    | Novel |
| DUSP19       | ZNF804A | Novel |
| EI24         | NRGN    | Novel |
| EIF4EBP1     | NRG1    | Novel |
| ELAC2        | GID4    | Novel |
| EML1         | GRIN2A  | Novel |
| ENTPD4       | PPP3CC  | Novel |
| EPB41L4A-AS1 | MAN2A1  | Novel |
| EPC2         | FAP     | Novel |

|              |       |
|--------------|-------|
| DEK          | Novel |
| DESI1        | Novel |
| DGKH         | Novel |
| DHDDS        | Novel |
| DIRAS3       | Novel |
| DKK4         | Novel |
| DNAJC10      | Novel |
| DNAL4        | Novel |
| DPCD         | Novel |
| DUSP19       | Novel |
| E2F6         | Novel |
| EFTUD1       | Novel |
| EGLN1        | Novel |
| EI24         | Novel |
| ELAC2        | Novel |
| EML1         | Novel |
| ENTPD4       | Novel |
| EPB41L4A-AS1 | Novel |
| EPHA2        | Novel |
| ERAP2        | Novel |
| ETFA         | Novel |
| ETFDH        | Novel |
| ETNK1        | Novel |
| EXTL1        | Novel |
| FAM103A1     | Novel |
| FAM106A      | Novel |
| FAM13B       | Novel |
| FAM171B      | Novel |
| FAM53C       | Novel |
| FAM63A       | Novel |
| FAM83D       | Novel |
| FAP          | Novel |
| FBLN1        | Novel |
| FBXL15       | Novel |
| FBXO21       | Novel |
| FBXO42       | Novel |
| FBXO8        | Novel |
| FGFR1        | Novel |
| FGL2         | Novel |
| FHL2         | Novel |
| FSCN1        | Novel |
| FURIN        | Novel |
| FZD3         | Novel |
| GABARAPL2    | Novel |
| GEMIN5       | Novel |
| GFRA2        | Novel |
| GGT3P        | Novel |

|           |          |       |
|-----------|----------|-------|
| EPC2      | MMADHC   | Novel |
| EPC2      | NMI      | Novel |
| EPHA2     | GIGYF2   | Novel |
| ETF1      | MYOZ2    | Novel |
| ETF1      | UBE4B    | Novel |
| ETF1      | WFDC1    | Novel |
| FAM106A   | GID4     | Novel |
| FAM13B    | KDM3B    | Novel |
| FAM171B   | ZNF804A  | Novel |
| FAM53C    | KDM3B    | Novel |
| FAM63A    | OTUD7B   | Novel |
| FAM83D    | PPP1R16B | Novel |
| FBLN1     | TCF20    | Novel |
| FBXO42    | RERE     | Novel |
| FBXO8     | GPM6A    | Novel |
| FES       | FURIN    | Novel |
| FES       | MAN2A2   | Novel |
| FES       | NLGN4X   | Novel |
| FES       | PEX11A   | Novel |
| FES       | STARD5   | Novel |
| FES       | VANGL1   | Novel |
| FES       | ZNF117   | Novel |
| FGFR1     | NRG1     | Novel |
| FHL2      | MTHFR    | Novel |
| FSCN1     | MAD1L1   | Novel |
| GABARAPL2 | GPM6A    | Novel |
| GALNT10   | GEMIN5   | Novel |
| GALNT10   | LCP2     | Novel |
| GALNT10   | SAP30L   | Novel |
| GALNT10   | SPINK7   | Novel |
| GFRA2     | PPP3CC   | Novel |
| GGT3P     | PRODH    | Novel |
| GID4      | LRRC48   | Novel |
| GIGYF2    | METTL21A | Novel |
| GIGYF2    | NMUR1    | Novel |
| GJD2      | PAK6     | Novel |
| GMFG      | PTGIS    | Novel |
| GNAS      | PTGIS    | Novel |
| GPR137B   | NLGN4X   | Novel |
| GPR88     | MIR137HG | Novel |
| GRIN2A    | ID4      | Novel |
| GRIN2A    | PCDH8    | Novel |
| GRIN2A    | PLA2G10  | Novel |
| GRIN2A    | PRM1     | Novel |
| GRIN2A    | RNF40    | Novel |
| GRM3      | OCM2     | Novel |
| GRM3      | SLC22A1  | Novel |

|           |       |
|-----------|-------|
| GHRL      | Novel |
| GJD2      | Novel |
| GMFG      | Novel |
| GNAS      | Novel |
| GOLGA2P10 | Novel |
| GPC6      | Novel |
| GPR137B   | Novel |
| GPR85     | Novel |
| GPR88     | Novel |
| GPRC5C    | Novel |
| GSC2      | Novel |
| GTF2H2    | Novel |
| GTPBP1    | Novel |
| GUK1      | Novel |
| GYPA      | Novel |
| HCAR3     | Novel |
| HCK       | Novel |
| HDGFL1    | Novel |
| HDGFRP3   | Novel |
| HMGXB4    | Novel |
| HOPX      | Novel |
| HOXA10    | Novel |
| HPCA      | Novel |
| HRH1      | Novel |
| HS3ST1    | Novel |
| HSD17B12  | Novel |
| IDH3A     | Novel |
| IGHV5-78  | Novel |
| IL10RA    | Novel |
| ILF2      | Novel |
| INF2      | Novel |
| INPPL1    | Novel |
| ISG20     | Novel |
| ITM2C     | Novel |
| JOSD1     | Novel |
| KBTBD4    | Novel |
| KCNC4     | Novel |
| KCNJ3     | Novel |
| KCNJ4     | Novel |
| KCNK4     | Novel |
| KIAA1715  | Novel |
| KIF2C     | Novel |
| KMT2D     | Novel |
| KNTC1     | Novel |
| KXD1      | Novel |
| LAMP3     | Novel |
| LCP1      | Novel |

|          |           |       |
|----------|-----------|-------|
| GRM3     | ZNF219    | Novel |
| GRM3     | ZNF804B   | Novel |
| GSC2     | PRODH     | Novel |
| GSK3A    | MPHOSPH9  | Novel |
| GUK1     | STAG1     | Novel |
| HAX1     | KCNN3     | Novel |
| HCAR3    | MPHOSPH9  | Novel |
| HCN1     | LOC153684 | Novel |
| HOXA10   | MAD1L1    | Novel |
| HOXA10   | NAB2      | Novel |
| HRH1     | NAB2      | Novel |
| HS3ST1   | PRKD1     | Novel |
| HSPB7    | RERE      | Novel |
| HTR2A    | PCDH9     | Novel |
| HTR2A    | RFXAP     | Novel |
| HTR2A    | SUGT1     | Novel |
| IGSF9B   | NCAPD3    | Novel |
| ILF2     | KCNN3     | Novel |
| INPP5K   | SMG6      | Novel |
| ISG20    | NRG1      | Novel |
| ITM2C    | PRODH     | Novel |
| KCNC4    | TNF       | Novel |
| KCNJ3    | NFATC3    | Novel |
| KCNK4    | NRG1      | Novel |
| KCNN3    | SLC27A3   | Novel |
| KCNN3    | UBAP2L    | Novel |
| KDM3B    | PCDH12    | Novel |
| KDM3B    | PCDHGB7   | Novel |
| KDM3B    | PCDHGC4   | Novel |
| KDM3B    | PCDHGC5   | Novel |
| KDM3B    | REEP2     | Novel |
| KIAA1715 | RERE      | Novel |
| KMT2D    | SHMT2     | Novel |
| KNTC1    | MPHOSPH9  | Novel |
| KXD1     | SRPK2     | Novel |
| LAMP3    | SOX2-OT   | Novel |
| LCP1     | NLGN4X    | Novel |
| LEPROTL1 | PPP3CC    | Novel |
| LIPF     | NRG1      | Novel |
| LIPG     | TCF4      | Novel |
| LPPR5    | MIR137HG  | Novel |
| LRP1     | NAB2      | Novel |
| LTB4R2   | PTGIS     | Novel |
| MAD1L1   | NXPH1     | Novel |
| MAD1L1   | PIN4      | Novel |
| MAD1L1   | PRKAR1B   | Novel |
| MAD1L1   | RPA3      | Novel |

|           |       |
|-----------|-------|
| LCP2      | Novel |
| LEPROTL1  | Novel |
| LIPF      | Novel |
| LIPG      | Novel |
| LOC153684 | Novel |
| LPPR5     | Novel |
| LRP2BP    | Novel |
| LRRC48    | Novel |
| LTB4R2    | Novel |
| MAN2A2    | Novel |
| MARS2     | Novel |
| MBTPS2    | Novel |
| MCEE      | Novel |
| MED23     | Novel |
| MEIS2     | Novel |
| METTTL21A | Novel |
| MICAL3    | Novel |
| MIS12     | Novel |
| MITF      | Novel |
| MKI67     | Novel |
| MKRN2     | Novel |
| MLEC      | Novel |
| MMADHC    | Novel |
| MMP23B    | Novel |
| MOB1B     | Novel |
| MPPED2    | Novel |
| MPZ       | Novel |
| MRPL12    | Novel |
| MRPL19    | Novel |
| MRPL36    | Novel |
| MRPL40    | Novel |
| MRPS5     | Novel |
| MSH5      | Novel |
| MSL2      | Novel |
| MSRB2     | Novel |
| MTCH2     | Novel |
| MYL9      | Novel |
| MYO16     | Novel |
| MYOCD     | Novel |
| MYOZ2     | Novel |
| NAT1      | Novel |
| NCAPD3    | Novel |
| NDUFA10   | Novel |
| NEK1      | Novel |
| NEU1      | Novel |
| NFKBIL1   | Novel |
| NFX1      | Novel |



|          |          |       |
|----------|----------|-------|
| MAD1L1   | S100P    | Novel |
| MAD1L1   | STAM     | Novel |
| MAD1L1   | TTYH3    | Novel |
| MAD1L1   | TULP4    | Novel |
| MARS2    | TYW5     | Novel |
| MCEE     | PPP1R16B | Novel |
| MICAL3   | ZDHHC8   | Novel |
| MIR137HG | SLC44A3  | Novel |
| MIR137HG | TMEM56   | Novel |
| MITF     | RERE     | Novel |
| MKRN2    | MPP6     | Novel |
| MLEC     | MPHOSPH9 | Novel |
| MMP23B   | MTHFR    | Novel |
| MOB1B    | TNF      | Novel |
| MPHOSPH9 | MRPL19   | Novel |
| MPHOSPH9 | RAB35    | Novel |
| MPHOSPH9 | SNRNP35  | Novel |
| MPHOSPH9 | SRSF9    | Novel |
| MPHOSPH9 | TRA2A    | Novel |
| MPP6     | OSBPL3   | Novel |
| MPP6     | PTF1A    | Novel |
| MPP6     | TACR3    | Novel |
| MPZ      | RGS4     | Novel |
| MRPL12   | SMG6     | Novel |
| MRPL36   | SLC6A3   | Novel |
| MRPL40   | ZDHHC8   | Novel |
| MSH5     | NOTCH4   | Novel |
| MSL2     | STAG1    | Novel |
| MTHFR    | PRKCZ    | Novel |
| MTHFR    | TP73     | Novel |
| MTHFR    | ZBTB17   | Novel |
| MTHFR    | ZNF239   | Novel |
| MYL9     | PPP1R16B | Novel |
| MYO1A    | NAB2     | Novel |
| MYOCD    | NFATC3   | Novel |
| NAB2     | RDH5     | Novel |
| NAB2     | SCN1A    | Novel |
| NEU1     | NOTCH4   | Novel |
| NFATC3   | SEC24A   | Novel |
| NFATC3   | SNX20    | Novel |
| NFATC3   | TOR1B    | Novel |
| NFKBIL1  | NOTCH4   | Novel |
| NFX1     | PPP1R16B | Novel |
| NFYA     | NOTCH4   | Novel |
| NKD2     | SHMT2    | Novel |
| NKG7     | PRRG2    | Novel |
| NLGN4X   | ZSCAN31  | Novel |

|          |       |
|----------|-------|
| NFYA     | Novel |
| NKD2     | Novel |
| NKG7     | Novel |
| NMI      | Novel |
| NMUR1    | Novel |
| NQO2     | Novel |
| NRP1     | Novel |
| NUP153   | Novel |
| NUP35    | Novel |
| NXPH1    | Novel |
| OCM2     | Novel |
| OOSP2    | Novel |
| OR10J1   | Novel |
| OSBPL3   | Novel |
| OSMR     | Novel |
| OVCH1    | Novel |
| OVGP1    | Novel |
| PAF1     | Novel |
| PATL1    | Novel |
| PBX2     | Novel |
| PCDH12   | Novel |
| PCDH8    | Novel |
| PCDH9    | Novel |
| PCDHGB7  | Novel |
| PCDHGC4  | Novel |
| PCDHGC5  | Novel |
| PCYOX1   | Novel |
| PDGFB    | Novel |
| PDIA3    | Novel |
| PEX10    | Novel |
| PEX11A   | Novel |
| PFDN2    | Novel |
| PGM3     | Novel |
| PHF5A    | Novel |
| PILRB    | Novel |
| PIN4     | Novel |
| PKHD1    | Novel |
| PLA2G10  | Novel |
| PLA2G6   | Novel |
| PLD3     | Novel |
| PLEKHB2  | Novel |
| POLE2    | Novel |
| POLR2I   | Novel |
| PPIL2    | Novel |
| PPP1R11  | Novel |
| PRDM4    | Novel |
| PRICKLE4 | Novel |

|          |           |       |
|----------|-----------|-------|
| NOTCH4   | PBX2      | Novel |
| NOTCH4   | PSMB8     | Novel |
| NOTCH4   | SLC27A4   | Novel |
| NOTCH4   | TDP2      | Novel |
| NOTCH4   | WWP2      | Novel |
| NRGN     | PLEKHB2   | Novel |
| NUP35    | ZNF804A   | Novel |
| OR10J1   | SRPK2     | Novel |
| OSMR     | RGS4      | Novel |
| OTUD7B   | TNFAIP8L2 | Novel |
| OVCH1    | TMTC1     | Novel |
| PAF1     | RERE      | Novel |
| PAK6     | SP3       | Novel |
| PAK6     | SPG11     | Novel |
| PAK6     | SUMO2     | Novel |
| PEX10    | PLCH2     | Novel |
| PFDN2    | RGS4      | Novel |
| PGM3     | SNAP91    | Novel |
| PIAS2    | TCF4      | Novel |
| PILRB    | TNF       | Novel |
| PKHD1    | PTGIS     | Novel |
| PLCH2    | TP73-AS1  | Novel |
| PLD3     | VRK2      | Novel |
| POLR2I   | ZNF536    | Novel |
| PPIL2    | ZDHHC8    | Novel |
| PPP1R11  | TNF       | Novel |
| PPP1R16B | SSR4      | Novel |
| PPP1R16B | TTI1      | Novel |
| PPP1R16B | TUFM      | Novel |
| PPP2R1A  | PRRG2     | Novel |
| PPP3CC   | SLC18A1   | Novel |
| PPP3CC   | SORBS3    | Novel |
| PRKACA   | TCF4      | Novel |
| PRKAG1   | SHMT2     | Novel |
| PRKD1    | RGS1      | Novel |
| PRKD1    | YY1       | Novel |
| PRO2964  | ZNF804A   | Novel |
| PRODH    | SEPT5     | Novel |
| PRODH    | RANBP1    | Novel |
| PRODH    | SKIV2L    | Novel |
| PRODH    | TBX1      | Novel |
| PRPF8    | SMG6      | Novel |
| PRRG2    | RTN4RL1   | Novel |
| PRRG2    | SGTA      | Novel |
| PRRG2    | SNX15     | Novel |
| PTGIS    | TMSB4XP6  | Novel |
| PTTG1    | VRK2      | Novel |

|           |       |
|-----------|-------|
| PRKAG1    | Novel |
| PRKAR1B   | Novel |
| PRM1      | Novel |
| PRO2964   | Novel |
| PRPF8     | Novel |
| PSG7      | Novel |
| PSMB8     | Novel |
| PSMC3     | Novel |
| PTER      | Novel |
| PTTG1     | Novel |
| RAB35     | Novel |
| RAB5C     | Novel |
| RAD51AP1  | Novel |
| RANBP1    | Novel |
| RAP1GAP2  | Novel |
| RBM22     | Novel |
| RDH5      | Novel |
| REEP2     | Novel |
| RFXAP     | Novel |
| RGS1      | Novel |
| RGS7      | Novel |
| RIPPLY2   | Novel |
| RND1      | Novel |
| RNF144B   | Novel |
| RNF40     | Novel |
| RPA3      | Novel |
| RPL18A    | Novel |
| RRM1      | Novel |
| RTN4R     | Novel |
| RTN4RL1   | Novel |
| RWDD2A    | Novel |
| S100P     | Novel |
| SAP30L    | Novel |
| SATB2-AS1 | Novel |
| SCAF11    | Novel |
| SCAMP2    | Novel |
| SCN1A     | Novel |
| SDHC      | Novel |
| SEC24A    | Novel |
| SEMA7A    | Novel |
| SEPT3     | Novel |
| SEPT5     | Novel |
| SETBP1    | Novel |
| SFXN2     | Novel |
| SGSH      | Novel |
| SGTA      | Novel |
| SKIV2L    | Novel |

|           |         |       |
|-----------|---------|-------|
| RAP1GAP2  | SMG6    | Novel |
| RERE      | ZBTB17  | Novel |
| RERE      | ZNF239  | Novel |
| RGS4      | RRM1    | Novel |
| RGS4      | SDHC    | Novel |
| RGS4      | UAP1    | Novel |
| RGS6      | TMED10  | Novel |
| RGS7      | SDCCAG8 | Novel |
| RIPPLY2   | SNAP91  | Novel |
| RND1      | SHMT2   | Novel |
| RPL18A    | TCF4    | Novel |
| RTN4R     | ZDHHHC8 | Novel |
| RWDD2A    | SNAP91  | Novel |
| SATB2-AS1 | TYW5    | Novel |
| SCAF11    | SHMT2   | Novel |
| SETBP1    | TCF4    | Novel |
| SHMT2     | TUBA1C  | Novel |
| SLC6A4    | SMAD2   | Novel |
| SMAD2     | TCF4    | Novel |
| SMC1B     | STAG1   | Novel |
| SMG6      | SNAI2   | Novel |
| SRPK2     | TRIM4   | Novel |
| ST5       | TCF4    | Novel |
| STAG1     | VDR     | Novel |
| TAPBP     | TNF     | Novel |
| TBC1D22A  | TCF20   | Novel |
| TCF20     | TRAM1   | Novel |
| TCF20     | TST     | Novel |
| TCF20     | UGT2B4  | Novel |
| TCF20     | ZMYND11 | Novel |
| TNF       | TNXB    | Novel |
| TOP1MT    | TSNARE1 | Novel |
| TSHZ3     | ZNF536  | Novel |
| TSNARE1   | ZNF707  | Novel |
| UBE2E3    | ZNF804A | Novel |
| ZC3H15    | ZNF804A | Novel |
| ZNF804A   | ZSWIM2  | Novel |
| A2M       | APOE    | Known |
| AATF      | MPP6    | Known |
| ABCA1     | MPP6    | Known |
| ABI3      | DTNBP1  | Known |
| ABL1      | PRKD1   | Known |
| ABL1      | SRPK2   | Known |
| ACTG1     | APOE    | Known |
| ACTG1     | DISC1   | Known |
| ACTN1     | GRIN2A  | Known |
| ACTN2     | DISC1   | Known |

|           |       |
|-----------|-------|
| SLC18A1   | Novel |
| SLC22A1   | Novel |
| SLC27A3   | Novel |
| SLC27A4   | Novel |
| SLC35C1   | Novel |
| SLC44A3   | Novel |
| SMC1B     | Novel |
| SMCO4     | Novel |
| SNAI2     | Novel |
| SNX15     | Novel |
| SNX20     | Novel |
| SP3       | Novel |
| SPG11     | Novel |
| SPINK7    | Novel |
| SPTSSB    | Novel |
| SRA1      | Novel |
| SSR4      | Novel |
| ST5       | Novel |
| STAM      | Novel |
| STARD5    | Novel |
| SUGT1     | Novel |
| SULT2A1   | Novel |
| SYNGR1    | Novel |
| TACR3     | Novel |
| TAPBP     | Novel |
| TBC1D22A  | Novel |
| TBCA      | Novel |
| TBX1      | Novel |
| TDRD9     | Novel |
| TMED10    | Novel |
| TMEM56    | Novel |
| TMSB4XP6  | Novel |
| TNFAIP8L2 | Novel |
| TNXB      | Novel |
| TOP1MT    | Novel |
| TOR1B     | Novel |
| TP53BP2   | Novel |
| TP73      | Novel |
| TP73-AS1  | Novel |
| TPMT      | Novel |
| TRAM1     | Novel |
| TRIM4     | Novel |
| TRMT61A   | Novel |
| TST       | Novel |
| TTI1      | Novel |
| TTYH3     | Novel |
| TUBA1C    | Novel |

|          |           |       |
|----------|-----------|-------|
| ADAM17   | TNF       | Known |
| ADAMTSL3 | KRT40     | Known |
| ADAMTSL3 | KRTAP10-3 | Known |
| ADAMTSL3 | KRTAP10-8 | Known |
| ADAMTSL3 | KRTAP2-4  | Known |
| ADAMTSL3 | NOTCH2NL  | Known |
| ADCY6    | CHRNA7    | Known |
| ADORA2A  | DRD2      | Known |
| ADPRH    | SRPK2     | Known |
| AES      | NAB2      | Known |
| AES      | SRPK2     | Known |
| AES      | TCF4      | Known |
| AGTPBP1  | DISC1     | Known |
| AKAP6    | DISC1     | Known |
| AKAP6    | DTNBP1    | Known |
| AKAP9    | DISC1     | Known |
| AKT1     | ACAP1     | Known |
| AKT1     | AHNAK     | Known |
| AKT1     | AKT1S1    | Known |
| AKT1     | AKT2      | Known |
| AKT1     | AKTIP     | Known |
| AKT1     | ALYREF    | Known |
| AKT1     | APLP2     | Known |
| AKT1     | APOH      | Known |
| AKT1     | APP       | Known |
| AKT1     | APPL1     | Known |
| AKT1     | AR        | Known |
| AKT1     | ARFIP2    | Known |
| AKT1     | ARHGAP29  | Known |
| AKT1     | ARHGAP32  | Known |
| AKT1     | ATXN1     | Known |
| AKT1     | BAD       | Known |
| AKT1     | BCL10     | Known |
| AKT1     | BCL2L1    | Known |
| AKT1     | BCL2L11   | Known |
| AKT1     | BPGM      | Known |
| AKT1     | BRAF      | Known |
| AKT1     | BRCA1     | Known |
| AKT1     | CAMKK1    | Known |
| AKT1     | CARHSP1   | Known |
| AKT1     | CASP3     | Known |
| AKT1     | CASP9     | Known |
| AKT1     | CCDC88A   | Known |
| AKT1     | CDKN1A    | Known |
| AKT1     | CDKN1B    | Known |
| AKT1     | CDKN1C    | Known |
| AKT1     | CHEK1     | Known |

|         |       |
|---------|-------|
| TUFM    | Novel |
| TULP4   | Novel |
| UAP1    | Novel |
| UBAP2L  | Novel |
| UBE4B   | Novel |
| UGT2B4  | Novel |
| UNG     | Novel |
| VANGL1  | Novel |
| VDR     | Novel |
| VPS18   | Novel |
| VWA5A   | Novel |
| WBP1L   | Novel |
| WDR25   | Novel |
| WFDC1   | Novel |
| WWP2    | Novel |
| YY1     | Novel |
| ZAP70   | Novel |
| ZBP1    | Novel |
| ZBTB17  | Novel |
| ZC3H15  | Novel |
| ZMYND11 | Novel |
| ZNF117  | Novel |
| ZNF219  | Novel |
| ZNF239  | Novel |
| ZNF43   | Novel |
| ZNF707  | Novel |
| ZNF804B | Novel |
| ZSCAN31 | Novel |
| ZSWIM2  | Novel |
| A2M     | Known |
| AATF    | Known |
| ABCA1   | Known |
| ABI3    | Known |
| ABL1    | Known |
| ABTB1   | Known |
| ABTB2   | Known |
| ACAP1   | Known |
| ACE     | Known |
| ACIN1   | Known |
| ACTG1   | Known |
| ACTN1   | Known |
| ACTN2   | Known |
| ADAM17  | Known |
| ADAM19  | Known |
| ADAM9   | Known |
| ADAP1   | Known |
| ADCY6   | Known |

|      |           |       |
|------|-----------|-------|
| AKT1 | CHN2      | Known |
| AKT1 | CHUK      | Known |
| AKT1 | CLIP3     | Known |
| AKT1 | CLK2      | Known |
| AKT1 | CREB1     | Known |
| AKT1 | CREBBP    | Known |
| AKT1 | CSNK2A1   | Known |
| AKT1 | CTNNB1    | Known |
| AKT1 | CYLD      | Known |
| AKT1 | DAB2IP    | Known |
| AKT1 | DCTN1     | Known |
| AKT1 | DLC1      | Known |
| AKT1 | DNAJB1    | Known |
| AKT1 | DNMT1     | Known |
| AKT1 | EEF1G     | Known |
| AKT1 | EGFR      | Known |
| AKT1 | EIF4EBP1  | Known |
| AKT1 | EP300     | Known |
| AKT1 | ESR1      | Known |
| AKT1 | ESR2      | Known |
| AKT1 | EZH2      | Known |
| AKT1 | FANCA     | Known |
| AKT1 | FOXO1     | Known |
| AKT1 | FOXO3     | Known |
| AKT1 | FOXO4     | Known |
| AKT1 | GAB2      | Known |
| AKT1 | GATA1     | Known |
| AKT1 | GATA2     | Known |
| AKT1 | GRB10     | Known |
| AKT1 | GSK3A     | Known |
| AKT1 | GSK3B     | Known |
| AKT1 | HIST2H2BE | Known |
| AKT1 | HMOX1     | Known |
| AKT1 | HSP90AA1  | Known |
| AKT1 | HSP90AB1  | Known |
| AKT1 | HSPB1     | Known |
| AKT1 | HTT       | Known |
| AKT1 | IKBKB     | Known |
| AKT1 | ILK       | Known |
| AKT1 | IMPDH2    | Known |
| AKT1 | IRAK1     | Known |
| AKT1 | IRS1      | Known |
| AKT1 | ITGB3     | Known |
| AKT1 | ITPR1     | Known |
| AKT1 | ITPR3     | Known |
| AKT1 | JADE1     | Known |
| AKT1 | KAT2B     | Known |

|          |       |
|----------|-------|
| ADGRG5   | Known |
| ADORA2A  | Known |
| ADPRH    | Known |
| AES      | Known |
| AGO3     | Known |
| AGTPBP1  | Known |
| AHCYL1   | Known |
| AHNAK    | Known |
| AKAP13   | Known |
| AKAP6    | Known |
| AKAP9    | Known |
| AKT1S1   | Known |
| AKT2     | Known |
| AKTIP    | Known |
| ALB      | Known |
| ALG13    | Known |
| ALKBH3   | Known |
| ALOX5    | Known |
| ALYREF   | Known |
| AMMECR1L | Known |
| AMOTL2   | Known |
| AMPH     | Known |
| ANKH     | Known |
| ANKS1B   | Known |
| AOC1     | Known |
| AP1M1    | Known |
| AP2A2    | Known |
| AP2B1    | Known |
| AP4M1    | Known |
| APC      | Known |
| APEX1    | Known |
| APLP2    | Known |
| APOBEC3C | Known |
| APOH     | Known |
| APP      | Known |
| APPL1    | Known |
| AQP1     | Known |
| AR       | Known |
| ARFGAP1  | Known |
| ARFIP2   | Known |
| ARGLU1   | Known |
| ARHGAP12 | Known |
| ARHGAP18 | Known |
| ARHGAP29 | Known |
| ARHGAP32 | Known |
| ARHGEF1  | Known |
| ARHGEF12 | Known |

|      |          |       |
|------|----------|-------|
| AKT1 | KAT6A    | Known |
| AKT1 | KRT10    | Known |
| AKT1 | KTN1     | Known |
| AKT1 | LRRK2    | Known |
| AKT1 | MAP2K4   | Known |
| AKT1 | MAP3K11  | Known |
| AKT1 | MAP3K5   | Known |
| AKT1 | MAP3K8   | Known |
| AKT1 | MAPK14   | Known |
| AKT1 | MAPK8IP1 | Known |
| AKT1 | MAPKAPK2 | Known |
| AKT1 | MAPT     | Known |
| AKT1 | MDM2     | Known |
| AKT1 | MDM4     | Known |
| AKT1 | METTL1   | Known |
| AKT1 | MS4A2    | Known |
| AKT1 | MST1R    | Known |
| AKT1 | MTCP1    | Known |
| AKT1 | MTOR     | Known |
| AKT1 | MUL1     | Known |
| AKT1 | MXD1     | Known |
| AKT1 | NCOA4    | Known |
| AKT1 | NCOR2    | Known |
| AKT1 | NF2      | Known |
| AKT1 | NOS3     | Known |
| AKT1 | NOTCH1   | Known |
| AKT1 | NR4A1    | Known |
| AKT1 | PAK1     | Known |
| AKT1 | PAK6     | Known |
| AKT1 | PDE3B    | Known |
| AKT1 | PDK2     | Known |
| AKT1 | PDPK1    | Known |
| AKT1 | PEA15    | Known |
| AKT1 | PFKFB1   | Known |
| AKT1 | PFKFB2   | Known |
| AKT1 | PHB2     | Known |
| AKT1 | PI4K2B   | Known |
| AKT1 | PIAS1    | Known |
| AKT1 | PIAS2    | Known |
| AKT1 | PIK3R1   | Known |
| AKT1 | PKN2     | Known |
| AKT1 | PLCG1    | Known |
| AKT1 | PLEKHO1  | Known |
| AKT1 | PLXNA1   | Known |
| AKT1 | PPARGC1B | Known |
| AKT1 | PPL      | Known |
| AKT1 | PPM1A    | Known |

|           |       |
|-----------|-------|
| ARIH2     | Known |
| ARL6IP1   | Known |
| ARL6IP4   | Known |
| ARMC7     | Known |
| ARPC1B    | Known |
| ASCL1     | Known |
| ASCL3     | Known |
| ASCL4     | Known |
| ASPSCR1   | Known |
| ATAT1     | Known |
| ATF4      | Known |
| ATF5      | Known |
| ATF7IP    | Known |
| ATN1      | Known |
| ATP6V1B2  | Known |
| ATXN1     | Known |
| AURKA     | Known |
| BAD       | Known |
| BAG5      | Known |
| BAIAP2    | Known |
| BARD1     | Known |
| BCAR1     | Known |
| BCAS2     | Known |
| BCL10     | Known |
| BCL2      | Known |
| BCL2L1    | Known |
| BCL2L11   | Known |
| BCL2L2    | Known |
| BCR       | Known |
| BECN1     | Known |
| BGN       | Known |
| BICD1     | Known |
| BLOC1S5   | Known |
| BLOC1S6   | Known |
| BMPR1B    | Known |
| BPGM      | Known |
| BRAF      | Known |
| BRCA1     | Known |
| BRD3      | Known |
| BRF1      | Known |
| BRK1      | Known |
| BTBD10    | Known |
| BTK       | Known |
| BZRAP1    | Known |
| C14orf166 | Known |
| C16orf78  | Known |
| C17orf85  | Known |

|      |         |       |
|------|---------|-------|
| AKT1 | PPP1CA  | Known |
| AKT1 | PPP2CA  | Known |
| AKT1 | PPP2R1A | Known |
| AKT1 | PPP2R4  | Known |
| AKT1 | PRG2    | Known |
| AKT1 | PRKCQ   | Known |
| AKT1 | PRKCZ   | Known |
| AKT1 | PRKDC   | Known |
| AKT1 | PTEN    | Known |
| AKT1 | PTPN1   | Known |
| AKT1 | RAB3D   | Known |
| AKT1 | RAC1    | Known |
| AKT1 | RAF1    | Known |
| AKT1 | RARA    | Known |
| AKT1 | RGCC    | Known |
| AKT1 | RHEBL1  | Known |
| AKT1 | RICTOR  | Known |
| AKT1 | RNF11   | Known |
| AKT1 | RNF115  | Known |
| AKT1 | RPS6KB1 | Known |
| AKT1 | RQCD1   | Known |
| AKT1 | S1PR1   | Known |
| AKT1 | SETDB1  | Known |
| AKT1 | SH2B2   | Known |
| AKT1 | SH3RF1  | Known |
| AKT1 | SIRT1   | Known |
| AKT1 | SIRT6   | Known |
| AKT1 | SKI     | Known |
| AKT1 | SKP2    | Known |
| AKT1 | SMAD2   | Known |
| AKT1 | SMAD3   | Known |
| AKT1 | SMAD4   | Known |
| AKT1 | SMAD7   | Known |
| AKT1 | SMARCB1 | Known |
| AKT1 | SMARCC1 | Known |
| AKT1 | SNCA    | Known |
| AKT1 | SORBS2  | Known |
| AKT1 | SORBS3  | Known |
| AKT1 | SRC     | Known |
| AKT1 | STAT1   | Known |
| AKT1 | STK3    | Known |
| AKT1 | STK4    | Known |
| AKT1 | TBC1D4  | Known |
| AKT1 | TCL1A   | Known |
| AKT1 | TCL1B   | Known |
| AKT1 | TCL6    | Known |
| AKT1 | TERF2IP | Known |

|          |       |
|----------|-------|
| C18orf25 | Known |
| C19orf52 | Known |
| C19orf66 | Known |
| C1QBP    | Known |
| C1orf109 | Known |
| C1orf35  | Known |
| C4orf46  | Known |
| C9orf171 | Known |
| CABIN1   | Known |
| CABP1    | Known |
| CABP5    | Known |
| CACNB3   | Known |
| CACNG2   | Known |
| CADPS    | Known |
| CADPS2   | Known |
| CALM1    | Known |
| CALM2    | Known |
| CALM3    | Known |
| CALR     | Known |
| CAMK1D   | Known |
| CAMK2A   | Known |
| CAMK2B   | Known |
| CAMKK1   | Known |
| CAND1    | Known |
| CANX     | Known |
| CARHSP1  | Known |
| CASK     | Known |
| CASP3    | Known |
| CASP9    | Known |
| CBFA2T2  | Known |
| CBLN4    | Known |
| CBX5     | Known |
| CCDC101  | Known |
| CCDC136  | Known |
| CCDC141  | Known |
| CCDC146  | Known |
| CCDC153  | Known |
| CCDC24   | Known |
| CCDC28A  | Known |
| CCDC33   | Known |
| CCDC53   | Known |
| CCDC88A  | Known |
| CCDC94   | Known |
| CCDC97   | Known |
| CCHCR1   | Known |
| CCM2     | Known |
| CCNA2    | Known |

|       |          |       |
|-------|----------|-------|
| AKT1  | TERT     | Known |
| AKT1  | THEM4    | Known |
| AKT1  | TNFSF11  | Known |
| AKT1  | TOPBP1   | Known |
| AKT1  | TRIB3    | Known |
| AKT1  | TRIM13   | Known |
| AKT1  | TSC1     | Known |
| AKT1  | TSC2     | Known |
| AKT1  | TTC3     | Known |
| AKT1  | USP4     | Known |
| AKT1  | UXS1     | Known |
| AKT1  | VEGFA    | Known |
| AKT1  | VIM      | Known |
| AKT1  | WNK1     | Known |
| AKT1  | WNK4     | Known |
| AKT1  | XIAP     | Known |
| AKT1  | YAP1     | Known |
| AKT1  | YBX1     | Known |
| AKT1  | YWHAZ    | Known |
| AKT1  | ZFP36L1  | Known |
| AKT1  | ZHX1     | Known |
| AKT3  | NEDD4L   | Known |
| ALB   | APOE     | Known |
| ALOX5 | MAD1L1   | Known |
| AMPH  | PPP3CC   | Known |
| AOC1  | DAO      | Known |
| AP2A2 | SNAP91   | Known |
| AP2B1 | SNAP91   | Known |
| APC   | GIGYF2   | Known |
| APEX1 | SRPK2    | Known |
| APOE  | ANKH     | Known |
| APOE  | APP      | Known |
| APOE  | ARFGAP1  | Known |
| APOE  | C19orf52 | Known |
| APOE  | CDC37    | Known |
| APOE  | CNTF     | Known |
| APOE  | CSNK2A1  | Known |
| APOE  | CTSB     | Known |
| APOE  | CYP2C18  | Known |
| APOE  | CYP2C8   | Known |
| APOE  | ECSIT    | Known |
| APOE  | ELAVL1   | Known |
| APOE  | EPN2     | Known |
| APOE  | FARSA    | Known |
| APOE  | FBXL12   | Known |
| APOE  | FOXG1    | Known |
| APOE  | FXYP7    | Known |

|          |       |
|----------|-------|
| CCND1    | Known |
| CCND3    | Known |
| CCNE1    | Known |
| CCT2     | Known |
| CCT4     | Known |
| CDC25A   | Known |
| CDC27    | Known |
| CDC34    | Known |
| CDC37    | Known |
| CDC42    | Known |
| CDC42EP4 | Known |
| CDC5L    | Known |
| CDC73    | Known |
| CDCA7L   | Known |
| CDK1     | Known |
| CDK5     | Known |
| CDK5RAP3 | Known |
| CDK6     | Known |
| CDK7     | Known |
| CDKN1A   | Known |
| CDKN1B   | Known |
| CDKN1C   | Known |
| CDKN2C   | Known |
| CEP126   | Known |
| CEP170   | Known |
| CEP55    | Known |
| CEP57L1  | Known |
| CEP63    | Known |
| CEP70    | Known |
| CFTR     | Known |
| CHAF1A   | Known |
| CHCHD2   | Known |
| CHD2     | Known |
| CHEK1    | Known |
| CHERP    | Known |
| CHIC2    | Known |
| CHN2     | Known |
| CHRNA4   | Known |
| CHTOP    | Known |
| CHUK     | Known |
| CIT      | Known |
| CKS1B    | Known |
| CLDN19   | Known |
| CLIC6    | Known |
| CLIP3    | Known |
| CLK1     | Known |
| CLK2     | Known |



|      |         |       |
|------|---------|-------|
| APOE | GCDH    | Known |
| APOE | HTRA1   | Known |
| APOE | IFIT3   | Known |
| APOE | IFIT5   | Known |
| APOE | IQSEC1  | Known |
| APOE | LCAT    | Known |
| APOE | LDLR    | Known |
| APOE | LONP1   | Known |
| APOE | LOXL4   | Known |
| APOE | LRP1    | Known |
| APOE | LRP2    | Known |
| APOE | LRP8    | Known |
| APOE | MAP2    | Known |
| APOE | MAPT    | Known |
| APOE | MAST1   | Known |
| APOE | MID1IP1 | Known |
| APOE | NEFM    | Known |
| APOE | NOS3    | Known |
| APOE | PCMT1   | Known |
| APOE | PDCD4   | Known |
| APOE | PLEKHA6 | Known |
| APOE | PLTP    | Known |
| APOE | PRAM1   | Known |
| APOE | PRDX2   | Known |
| APOE | PRNP    | Known |
| APOE | PSEN1   | Known |
| APOE | RHEB    | Known |
| APOE | RNF32   | Known |
| APOE | RPL4    | Known |
| APOE | SCARB1  | Known |
| APOE | ST13    | Known |
| APOE | TYRO3   | Known |
| APOE | VLDLR   | Known |
| APOE | ZNF558  | Known |
| APP  | BDNF    | Known |
| APP  | CHRNA7  | Known |
| APP  | CUL3    | Known |
| APP  | KCNN3   | Known |
| APP  | PAK6    | Known |
| APP  | PPP3CC  | Known |
| APP  | PTGIS   | Known |
| APP  | SHMT2   | Known |
| APP  | SRPK2   | Known |
| AQP1 | TCF4    | Known |
| AR   | PAK6    | Known |
| AR   | TCF20   | Known |
| AR   | TCF4    | Known |

|         |       |
|---------|-------|
| CLK3    | Known |
| CLU     | Known |
| CMTM5   | Known |
| CMYA5   | Known |
| CNTF    | Known |
| COIL    | Known |
| COL4A1  | Known |
| COMMD1  | Known |
| COPB1   | Known |
| COPB2   | Known |
| COPS2   | Known |
| COPS5   | Known |
| COPS7A  | Known |
| CPE     | Known |
| CREB1   | Known |
| CREBBP  | Known |
| CRX     | Known |
| CSAG1   | Known |
| CSF1    | Known |
| CSF2RB  | Known |
| CSNK1A1 | Known |
| CSNK2A1 | Known |
| CSNK2B  | Known |
| CTBP1   | Known |
| CTNNB1  | Known |
| CTNBL1  | Known |
| CTSB    | Known |
| CWF19L2 | Known |
| CYLD    | Known |
| CYP2C18 | Known |
| CYP2C8  | Known |
| DAB2IP  | Known |
| DAW1    | Known |
| DBF4B   | Known |
| DCN     | Known |
| DCTN1   | Known |
| DCTN2   | Known |
| DCUN1D1 | Known |
| DCUN1D2 | Known |
| DCUN1D3 | Known |
| DCUN1D4 | Known |
| DCUN1D5 | Known |
| DDX21   | Known |
| DDX46   | Known |
| DDX6    | Known |
| DEF6    | Known |
| DGCR6   | Known |

|          |         |       |
|----------|---------|-------|
| ARFIP2   | DTNBP1  | Known |
| ARIH2    | DISC1   | Known |
| ASCL1    | TCF4    | Known |
| ATF4     | DISC1   | Known |
| ATF5     | DISC1   | Known |
| ATP2A2   | BCL2    | Known |
| ATP2A2   | CAMK2A  | Known |
| ATP2A2   | HGS     | Known |
| ATP2A2   | IRS1    | Known |
| ATP2A2   | IRS2    | Known |
| ATP2A2   | MDM2    | Known |
| ATP2A2   | PLN     | Known |
| ATP2A2   | S100A1  | Known |
| ATP2A2   | SPP1    | Known |
| ATP6V1B2 | TCF4    | Known |
| ATXN1    | ZNF804A | Known |
| BARD1    | CNTN4   | Known |
| BCL2     | PPP3CC  | Known |
| BCL2L2   | TCF4    | Known |
| BCR      | FES     | Known |
| BDNF     | AGO3    | Known |
| BDNF     | CADPS2  | Known |
| BDNF     | CPE     | Known |
| BDNF     | ESR1    | Known |
| BDNF     | F11R    | Known |
| BDNF     | INPP5K  | Known |
| BDNF     | JUNB    | Known |
| BDNF     | MBTPS1  | Known |
| BDNF     | NCAM1   | Known |
| BDNF     | NOS3    | Known |
| BDNF     | NTF3    | Known |
| BDNF     | NTRK2   | Known |
| BDNF     | SORT1   | Known |
| BECN1    | AMBRA1  | Known |
| BGN      | TNF     | Known |
| BICD1    | DISC1   | Known |
| BLOC1S5  | DTNBP1  | Known |
| BLOC1S6  | DTNBP1  | Known |
| BMPR1B   | PPP3CC  | Known |
| BRCA1    | CNTN4   | Known |
| BRF1     | DTNBP1  | Known |
| BRK1     | DTNBP1  | Known |
| BTK      | PRKD1   | Known |
| BZRAP1   | DISC1   | Known |
| C19orf66 | DTNBP1  | Known |
| C1QBP    | PRKD1   | Known |
| CACNA1C  | CABP1   | Known |

|         |       |
|---------|-------|
| DGCR6L  | Known |
| DHX8    | Known |
| DIS3    | Known |
| DLC1    | Known |
| DLG1    | Known |
| DLG2    | Known |
| DLG3    | Known |
| DLG4    | Known |
| DLGAP1  | Known |
| DLGAP2  | Known |
| DLL4    | Known |
| DMAP1   | Known |
| DMD     | Known |
| DMRT3   | Known |
| DNAJB1  | Known |
| DNAJC7  | Known |
| DNAJC8  | Known |
| DNM2    | Known |
| DNMT1   | Known |
| DOK1    | Known |
| DPYSL2  | Known |
| DPYSL3  | Known |
| DPYSL5  | Known |
| DRAP1   | Known |
| DRG1    | Known |
| DST     | Known |
| DTNA    | Known |
| DTNB    | Known |
| DYNC1H1 | Known |
| DYNLL1  | Known |
| DYNLRB1 | Known |
| DYRK4   | Known |
| ECM1    | Known |
| ECSIT   | Known |
| EED     | Known |
| EEF1B2  | Known |
| EEF1G   | Known |
| EEF2    | Known |
| EFEMP1  | Known |
| EFEMP2  | Known |
| EFHC1   | Known |
| EFNB1   | Known |
| EGF     | Known |
| EGFL7   | Known |
| EGFR    | Known |
| EGLN2   | Known |
| EGR1    | Known |

|         |        |       |
|---------|--------|-------|
| CACNA1C | CACNB3 | Known |
| CACNA1C | COPS5  | Known |
| CACNA1C | GNB1   | Known |
| CACNA1C | HDAC4  | Known |
| CACNA1C | PCBD1  | Known |
| CACNA1C | PPM1A  | Known |
| CACNA1C | PRKACA | Known |
| CACNA1C | RIMS1  | Known |
| CACNA1C | RYR2   | Known |
| CACNA1C | SRI    | Known |
| CACNB2  | PRKACA | Known |
| CACNB2  | REM1   | Known |
| CALM1   | DRD2   | Known |
| CALM1   | GRM3   | Known |
| CALM1   | KCNN3  | Known |
| CALM1   | NRGN   | Known |
| CALM1   | RGS4   | Known |
| CALM1   | STAG1  | Known |
| CALM1   | TCF4   | Known |
| CALM2   | TCF4   | Known |
| CALM3   | TCF4   | Known |
| CALR    | SLC6A4 | Known |
| CAMK2A  | GRIN2A | Known |
| CAMK2B  | GRIN2A | Known |
| CANX    | SLC6A4 | Known |
| CBX5    | BCL11B | Known |
| CCDC146 | DTNBP1 | Known |
| CCDC53  | DTNBP1 | Known |
| CCHCR1  | DTNBP1 | Known |
| CCNA2   | DTNBP1 | Known |
| CCND1   | CUL3   | Known |
| CCND3   | DTNBP1 | Known |
| CCNE1   | CUL3   | Known |
| CDC25A  | CUL3   | Known |
| CDC27   | COMT   | Known |
| CDC34   | CUL3   | Known |
| CDC42   | PAK6   | Known |
| CDC42   | VRK2   | Known |
| CDC5L   | DISC1  | Known |
| CDK1    | PAK6   | Known |
| CDK5    | GRIN2A | Known |
| CDK6    | NFATC3 | Known |
| CDK7    | SRPK2  | Known |
| CDKN1A  | TCF4   | Known |
| CDKN2C  | TCF4   | Known |
| CEP170  | DISC1  | Known |
| CFTR    | CLCN3  | Known |

|          |       |
|----------|-------|
| EGR2     | Known |
| EHMT2    | Known |
| EIF1AY   | Known |
| EIF3F    | Known |
| EIF3G    | Known |
| EIF3H    | Known |
| EIF4E2   | Known |
| EIF4EBP1 | Known |
| EIF5     | Known |
| ELAVL1   | Known |
| ELOVL7   | Known |
| ENOX2    | Known |
| EP300    | Known |
| EPAS1    | Known |
| EPB41    | Known |
| EPB41L1  | Known |
| EPB41L2  | Known |
| EPB41L3  | Known |
| EPB41L4A | Known |
| EPHB6    | Known |
| EPN2     | Known |
| EPS15    | Known |
| EPS8L3   | Known |
| ERBB2    | Known |
| ERBB3    | Known |
| ERBB4    | Known |
| ERCC3    | Known |
| ERN1     | Known |
| ESR1     | Known |
| ESR2     | Known |
| EVI5L    | Known |
| EXOC1    | Known |
| EXOC4    | Known |
| EXOC7    | Known |
| EXOSC1   | Known |
| EXOSC10  | Known |
| EXOSC2   | Known |
| EXOSC4   | Known |
| EXOSC5   | Known |
| EXOSC6   | Known |
| EXOSC7   | Known |
| EXOSC8   | Known |
| EXOSC9   | Known |
| EZH2     | Known |
| F11R     | Known |
| FAH      | Known |
| FAM124B  | Known |

|         |          |       |
|---------|----------|-------|
| CHD2    | SRPK2    | Known |
| CHRNA3  | CHRNB4   | Known |
| CHRNA3  | UBQLN1   | Known |
| CHRNA5  | CHRNB4   | Known |
| CHRNA7  | ATXN1    | Known |
| CHRNA7  | PIK3R1   | Known |
| CHUK    | SRPK2    | Known |
| CIT     | DISC1    | Known |
| CKS1B   | TCF4     | Known |
| CLCN3   | GOPC     | Known |
| CLCN3   | PDZK1    | Known |
| CLCN3   | SLC9A3R1 | Known |
| CLK1    | SRPK2    | Known |
| CLK2    | SRPK2    | Known |
| CLK3    | SRPK2    | Known |
| CLU     | DISC1    | Known |
| COIL    | MAD1L1   | Known |
| COL4A1  | DISC1    | Known |
| COMT    | ACE      | Known |
| COMT    | KRT31    | Known |
| COMT    | KRT40    | Known |
| COMT    | KRTAP5-9 | Known |
| COMT    | LITAF    | Known |
| COMT    | RGS2     | Known |
| COMT    | TRIP13   | Known |
| COMT    | VKORC1   | Known |
| COMT    | XRN2     | Known |
| COPB1   | RGS4     | Known |
| CREBBP  | KDM3B    | Known |
| CRX     | PPP1R16B | Known |
| CSF1    | TNF      | Known |
| CSF2RB  | FES      | Known |
| CSNK1A1 | NFATC3   | Known |
| CSNK2B  | PPP3CC   | Known |
| CSNK2B  | SHMT2    | Known |
| CTBP1   | TCF4     | Known |
| CTNNB1  | TCF4     | Known |
| CUL3    | ABTB1    | Known |
| CUL3    | ABTB2    | Known |
| CUL3    | ARHGEF12 | Known |
| CUL3    | BTBD10   | Known |
| CUL3    | CAMK1D   | Known |
| CUL3    | CAND1    | Known |
| CUL3    | COMMD1   | Known |
| CUL3    | DCUN1D1  | Known |
| CUL3    | DCUN1D2  | Known |
| CUL3    | DCUN1D3  | Known |

|           |       |
|-----------|-------|
| FAM131C   | Known |
| FAM208B   | Known |
| FAM74A4   | Known |
| FAM76B    | Known |
| FAM90A1   | Known |
| FANCA     | Known |
| FARSA     | Known |
| FATE1     | Known |
| FBXL12    | Known |
| FBXO41    | Known |
| FBXW7     | Known |
| FERD3L    | Known |
| FEZ1      | Known |
| FGF12     | Known |
| FKBP4     | Known |
| FKBP5     | Known |
| FLAD1     | Known |
| FLNA      | Known |
| FOLR1     | Known |
| FOS       | Known |
| FOXG1     | Known |
| FOXN3     | Known |
| FOXO1     | Known |
| FOXO3     | Known |
| FOXO4     | Known |
| FRS3      | Known |
| FRYL      | Known |
| FTL       | Known |
| FXR2      | Known |
| FXYD7     | Known |
| FYN       | Known |
| GAB2      | Known |
| GABARAP   | Known |
| GABARAPL1 | Known |
| GABBR1    | Known |
| GABRA1    | Known |
| GATA1     | Known |
| GATA2     | Known |
| GCC1      | Known |
| GCDH      | Known |
| GEM       | Known |
| GIPC1     | Known |
| GLP1R     | Known |
| GLRX3     | Known |
| GLTSCR1L  | Known |
| GLUL      | Known |
| GMCL1     | Known |

|       |           |       |
|-------|-----------|-------|
| CUL3  | DCUN1D4   | Known |
| CUL3  | DCUN1D5   | Known |
| CUL3  | DYRK4     | Known |
| CUL3  | GMCL1     | Known |
| CUL3  | KCTD13    | Known |
| CUL3  | KCTD5     | Known |
| CUL3  | KCTD6     | Known |
| CUL3  | KCTD9     | Known |
| CUL3  | KLHL12    | Known |
| CUL3  | KLHL2     | Known |
| CUL3  | KLHL20    | Known |
| CUL3  | KLHL3     | Known |
| CUL3  | KLHL42    | Known |
| CUL3  | KLHL5     | Known |
| CUL3  | OLIG2     | Known |
| CUL3  | PDIA2     | Known |
| CUL3  | RBX1      | Known |
| CUL3  | RCBTB1    | Known |
| CUL3  | RHOBTB3   | Known |
| CUL3  | RNF7      | Known |
| CUL3  | SHKBP1    | Known |
| CUL3  | UBE2E3    | Known |
| CUL3  | UBE2M     | Known |
| CUL3  | ZMAT4     | Known |
| DAO   | DAOA      | Known |
| DAO   | EP300     | Known |
| DAO   | PEX5      | Known |
| DAO   | PRKAB2    | Known |
| DCN   | TNF       | Known |
| DCTN1 | DISC1     | Known |
| DCTN1 | DTNBP1    | Known |
| DCTN2 | DISC1     | Known |
| DDX6  | SRPK2     | Known |
| DDX6  | TCF4      | Known |
| DHX8  | SRPK2     | Known |
| DIS3  | MPP6      | Known |
| DISC1 | ATF7IP    | Known |
| DISC1 | C14orf166 | Known |
| DISC1 | CCDC136   | Known |
| DISC1 | CCDC141   | Known |
| DISC1 | CCDC24    | Known |
| DISC1 | CCDC88A   | Known |
| DISC1 | CDK5RAP3  | Known |
| DISC1 | CEP126    | Known |
| DISC1 | CEP57L1   | Known |
| DISC1 | CEP63     | Known |
| DISC1 | EXOC1     | Known |

|          |       |
|----------|-------|
| GNA11    | Known |
| GNAI1    | Known |
| GNAI2    | Known |
| GNAI3    | Known |
| GNAO1    | Known |
| GNAQ     | Known |
| GNAZ     | Known |
| GNB1     | Known |
| GNB2L1   | Known |
| GNB5     | Known |
| GNG10    | Known |
| GNPTAB   | Known |
| GOLGA2   | Known |
| GOLGA8EP | Known |
| GOLGA8F  | Known |
| GOPC     | Known |
| GORASP2  | Known |
| GPRASP2  | Known |
| GPS1     | Known |
| GRASP    | Known |
| GRB10    | Known |
| GRB2     | Known |
| GRIA2    | Known |
| GRIN1    | Known |
| GRIN3A   | Known |
| GRIN3B   | Known |
| GRIP1    | Known |
| GSK3A    | Known |
| GSK3B    | Known |
| GSPT1    | Known |
| GSPT2    | Known |
| GTF2E1   | Known |
| GTF3C5   | Known |
| GUCD1    | Known |
| HAND2    | Known |
| HAT1     | Known |
| HAUS1    | Known |
| HAX1     | Known |
| HBP1     | Known |
| HBS1L    | Known |
| HCN2     | Known |
| HDAC1    | Known |
| HDAC2    | Known |
| HDAC4    | Known |
| HDAC5    | Known |
| HDAC7    | Known |
| HERC2P2  | Known |

|        |         |       |
|--------|---------|-------|
| DISC1  | EXOC4   | Known |
| DISC1  | FBXO41  | Known |
| DISC1  | FRYL    | Known |
| DISC1  | GNPTAB  | Known |
| DISC1  | GPRASP2 | Known |
| DISC1  | HERC2P2 | Known |
| DISC1  | IFT20   | Known |
| DISC1  | KANSL1  | Known |
| DISC1  | KCNQ5   | Known |
| DISC1  | MEMO1   | Known |
| DISC1  | NDE1    | Known |
| DISC1  | NDEL1   | Known |
| DISC1  | PCNXL4  | Known |
| DISC1  | RBSN    | Known |
| DISC1  | ROGDI   | Known |
| DISC1  | SNX6    | Known |
| DISC1  | SPTBN4  | Known |
| DISC1  | STX18   | Known |
| DISC1  | SYBU    | Known |
| DISC1  | TUBB    | Known |
| DLG1   | GRIN2A  | Known |
| DLG2   | GRIN2A  | Known |
| DLG3   | GRIN2A  | Known |
| DLG4   | GRIN2A  | Known |
| DLG4   | HTR2A   | Known |
| DLG4   | NLGN4X  | Known |
| DLGAP2 | NLGN4X  | Known |
| DMD    | DISC1   | Known |
| DNAJC7 | DISC1   | Known |
| DNM2   | MPP6    | Known |
| DNMT1  | RGS6    | Known |
| DOK1   | FES     | Known |
| DPYD   | GOPC    | Known |
| DPYD   | LXN     | Known |
| DPYSL2 | DISC1   | Known |
| DPYSL3 | DISC1   | Known |
| DRD2   | CADPS   | Known |
| DRD2   | CADPS2  | Known |
| DRD2   | CLIC6   | Known |
| DRD2   | EPB41   | Known |
| DRD2   | EPB41L1 | Known |
| DRD2   | FLNA    | Known |
| DRD2   | GIPC1   | Known |
| DRD2   | GNAI2   | Known |
| DRD2   | GNAI3   | Known |
| DRD2   | GNAZ    | Known |
| DRD2   | GRIA2   | Known |

|           |       |
|-----------|-------|
| HGS       | Known |
| HIC1      | Known |
| HIRIP3    | Known |
| HIST2H2AC | Known |
| HIST2H2BE | Known |
| HIST2H3C  | Known |
| HIST3H3   | Known |
| HLA-DMB   | Known |
| HMG3      | Known |
| HMOX1     | Known |
| HNRNPC    | Known |
| HNRNPD    | Known |
| HOMER3    | Known |
| HSF2      | Known |
| HSH2D     | Known |
| HSP90AA1  | Known |
| HSP90AB1  | Known |
| HSPA4     | Known |
| HSPB1     | Known |
| HSPB7     | Known |
| HTRA1     | Known |
| HTT       | Known |
| IBTK      | Known |
| ID1       | Known |
| ID2       | Known |
| ID3       | Known |
| ID4       | Known |
| IFIT3     | Known |
| IFIT5     | Known |
| IFNG      | Known |
| IFT20     | Known |
| IGF1R     | Known |
| IKBKB     | Known |
| IKZF3     | Known |
| IKZF4     | Known |
| IL16      | Known |
| IL4R      | Known |
| ILK       | Known |
| IMMT      | Known |
| IMPDH2    | Known |
| INADL     | Known |
| INPP5K    | Known |
| INS       | Known |
| IPO5      | Known |
| IQSEC1    | Known |
| IRAK1     | Known |
| IRS1      | Known |

|         |         |       |
|---------|---------|-------|
| DRD2    | KCNJ6   | Known |
| DRD2    | KCNJ9   | Known |
| DRD2    | NCS1    | Known |
| DRD2    | NSF     | Known |
| DRD2    | PAWR    | Known |
| DRD2    | PPP1R9B | Known |
| DRD2    | SLC6A3  | Known |
| DRD2    | SSTR5   | Known |
| DRD3    | CLIC6   | Known |
| DRD3    | EEF1B2  | Known |
| DRD3    | EEF1G   | Known |
| DRD3    | EPB41   | Known |
| DRD3    | EPB41L1 | Known |
| DRD3    | EPB41L2 | Known |
| DRD3    | FLNA    | Known |
| DRD3    | GIPC1   | Known |
| DRD3    | GNAI1   | Known |
| DRD3    | GRB2    | Known |
| DRD3    | MPDZ    | Known |
| DRD3    | NCK1    | Known |
| DRD3    | NCS1    | Known |
| DRD3    | RDX     | Known |
| DRD3    | USP48   | Known |
| DRD4    | CLIC6   | Known |
| DRD4    | GABRA1  | Known |
| DRD4    | GRB2    | Known |
| DRD4    | KCNJ9   | Known |
| DRD4    | KLHL12  | Known |
| DRD4    | NCK1    | Known |
| DRG1    | SRPK2   | Known |
| DST     | DISC1   | Known |
| DST     | DTNBP1  | Known |
| DTNA    | DTNBP1  | Known |
| DTNB    | DTNBP1  | Known |
| DTNBP1  | CCDC153 | Known |
| DTNBP1  | CMYA5   | Known |
| DTNBP1  | DGCR6L  | Known |
| DTNBP1  | HAUS1   | Known |
| DTNBP1  | IFT20   | Known |
| DTNBP1  | KANSL1  | Known |
| DTNBP1  | P4HA3   | Known |
| DTNBP1  | SFR1    | Known |
| DTNBP1  | SSC5D   | Known |
| DTNBP1  | TRIM9   | Known |
| DTNBP1  | TXLNB   | Known |
| DYNC1H1 | DISC1   | Known |
| DYNLL1  | AMBRA1  | Known |

|           |       |
|-----------|-------|
| IRS2      | Known |
| ITGB3     | Known |
| ITPKC     | Known |
| ITPR1     | Known |
| ITPR3     | Known |
| ITSN1     | Known |
| JADE1     | Known |
| JAK1      | Known |
| JAK2      | Known |
| JAK3      | Known |
| JAKMIP2   | Known |
| JUN       | Known |
| JUNB      | Known |
| JUP       | Known |
| KALRN     | Known |
| KANSL1    | Known |
| KAT2B     | Known |
| KAT6A     | Known |
| KCNJ6     | Known |
| KCNJ9     | Known |
| KCNN2     | Known |
| KCNQ5     | Known |
| KCTD13    | Known |
| KCTD14    | Known |
| KCTD5     | Known |
| KCTD6     | Known |
| KCTD9     | Known |
| KEAP1     | Known |
| KHDRBS1   | Known |
| KIAA0408  | Known |
| KIDINS220 | Known |
| KIF3A     | Known |
| KIF3C     | Known |
| KIFAP3    | Known |
| KIFC3     | Known |
| KLC3      | Known |
| KLHL12    | Known |
| KLHL2     | Known |
| KLHL20    | Known |
| KLHL3     | Known |
| KLHL32    | Known |
| KLHL42    | Known |
| KLHL5     | Known |
| KNSTRN    | Known |
| KRIT1     | Known |
| KRT10     | Known |
| KRT31     | Known |

|          |        |       |
|----------|--------|-------|
| EED      | EPC2   | Known |
| EEF2     | DISC1  | Known |
| EFNB1    | CUL3   | Known |
| EGF      | NRG1   | Known |
| EGFR     | FES    | Known |
| EGFR     | NRG1   | Known |
| EGFR     | PRKD1  | Known |
| EGFR     | RGS4   | Known |
| EGR1     | NAB2   | Known |
| EGR2     | NAB2   | Known |
| EIF3G    | MPP6   | Known |
| EIF3H    | DISC1  | Known |
| EIF4EBP1 | TCF4   | Known |
| EIF5     | NRGN   | Known |
| ELOVL7   | DTNBP1 | Known |
| EP300    | TCF4   | Known |
| EPAS1    | PRKD1  | Known |
| EPB41L1  | SRPK2  | Known |
| EPHB6    | TCF4   | Known |
| EPS15    | SNAP91 | Known |
| ERBB2    | NRG1   | Known |
| ERBB3    | NRG1   | Known |
| ERBB3    | RGS4   | Known |
| ERBB4    | NRG1   | Known |
| ERCC3    | SRPK2  | Known |
| ERN1     | SRPK2  | Known |
| ESR1     | PAK6   | Known |
| ESR1     | TCF20  | Known |
| ETF1     | GSPT1  | Known |
| ETF1     | GSPT2  | Known |
| ETF1     | KEAP1  | Known |
| ETF1     | LIG4   | Known |
| ETF1     | PPP2CA | Known |
| EXOC4    | DTNBP1 | Known |
| EXOC7    | DISC1  | Known |
| EXOC7    | DTNBP1 | Known |
| EXOSC10  | MPP6   | Known |
| EXOSC2   | MPP6   | Known |
| EXOSC7   | MPP6   | Known |
| EXOSC8   | MPP6   | Known |
| EXOSC9   | MPP6   | Known |
| EZH2     | EPC2   | Known |
| FAH      | TCF4   | Known |
| FES      | BCAR1  | Known |
| FES      | DPYSL5 | Known |
| FES      | FKBP4  | Known |
| FES      | FKBP5  | Known |

|           |       |
|-----------|-------|
| KRT40     | Known |
| KRTAP10-3 | Known |
| KRTAP10-8 | Known |
| KRTAP2-4  | Known |
| KRTAP4-12 | Known |
| KRTAP5-9  | Known |
| KTN1      | Known |
| LASP1     | Known |
| LCA5      | Known |
| LCAT      | Known |
| LCE3D     | Known |
| LDLR      | Known |
| LENG1     | Known |
| LGALS14   | Known |
| LGALSL    | Known |
| LIG4      | Known |
| LIMK1     | Known |
| LIN7A     | Known |
| LITAF     | Known |
| LMO1      | Known |
| LMO4      | Known |
| LNPEP     | Known |
| LNX1      | Known |
| LONP1     | Known |
| LOXL4     | Known |
| LRP1      | Known |
| LRP2      | Known |
| LRP8      | Known |
| LRRK2     | Known |
| LRRN4CL   | Known |
| LSM8      | Known |
| LUC7L     | Known |
| LUC7L2    | Known |
| LUC7L3    | Known |
| LUZP4     | Known |
| LXN       | Known |
| LYL1      | Known |
| LYN       | Known |
| LZTR1     | Known |
| MAB21L2   | Known |
| MACF1     | Known |
| MAD2L1    | Known |
| MAD2L2    | Known |
| MAGEB1    | Known |
| MAGOHB    | Known |
| MAML1     | Known |
| MAML2     | Known |



|          |         |       |
|----------|---------|-------|
| FES      | HSH2D   | Known |
| FES      | HSPA4   | Known |
| FES      | IL4R    | Known |
| FES      | IRS1    | Known |
| FES      | IRS2    | Known |
| FES      | JAK1    | Known |
| FES      | JAK2    | Known |
| FES      | JAK3    | Known |
| FES      | MDF1    | Known |
| FES      | NEDD4   | Known |
| FES      | PDE4DIP | Known |
| FES      | PIK3R1  | Known |
| FES      | PLXNA1  | Known |
| FES      | POT1    | Known |
| FES      | PPID    | Known |
| FES      | PTGES3  | Known |
| FES      | RASA1   | Known |
| FES      | RASA3   | Known |
| FES      | STAT3   | Known |
| FES      | TERF1   | Known |
| FES      | TRIM28  | Known |
| FES      | ZNF746  | Known |
| FES      | ZNF775  | Known |
| FEZ1     | DISC1   | Known |
| FGF12    | SRPK2   | Known |
| FLNA     | TCF4    | Known |
| FOLR1    | CUL3    | Known |
| FOS      | NFATC3  | Known |
| FOXN3    | SRPK2   | Known |
| FTL      | MPP6    | Known |
| FYN      | GRIN2A  | Known |
| FYN      | TNF     | Known |
| GABBR1   | RGS4    | Known |
| GEM      | TCF4    | Known |
| GIGYF2   | WBP11   | Known |
| GLP1R    | NRGN    | Known |
| GLTSCR1L | DTNBP1  | Known |
| GLUL     | HTR2A   | Known |
| GNA11    | HTR2A   | Known |
| GNAI1    | HTR2A   | Known |
| GNAI1    | RGS4    | Known |
| GNAI2    | RGS4    | Known |
| GNAO1    | RGS4    | Known |
| GNAQ     | HTR2A   | Known |
| GNAQ     | RGS4    | Known |
| GNB1     | DISC1   | Known |
| GNG10    | TCF4    | Known |

|          |       |
|----------|-------|
| MAML3    | Known |
| MAP1A    | Known |
| MAP2     | Known |
| MAP2K4   | Known |
| MAP2K7   | Known |
| MAP3K11  | Known |
| MAP3K5   | Known |
| MAP3K7   | Known |
| MAP3K8   | Known |
| MAPK14   | Known |
| MAPK3    | Known |
| MAPK8    | Known |
| MAPK8IP1 | Known |
| MAPK8IP2 | Known |
| MAPK9    | Known |
| MAPKAPK2 | Known |
| MAPKAPK5 | Known |
| MAPKBP1  | Known |
| MAPT     | Known |
| MAR10    | Known |
| MAST1    | Known |
| MATN3    | Known |
| MATR3    | Known |
| MAX      | Known |
| MBD3     | Known |
| MBTPS1   | Known |
| MCM7     | Known |
| MCOLN3   | Known |
| MDF1     | Known |
| MDK      | Known |
| MDM2     | Known |
| MDM4     | Known |
| MEMO1    | Known |
| MEN1     | Known |
| METTTL1  | Known |
| MFAP1    | Known |
| MID1IP1  | Known |
| MLLT10   | Known |
| MLLT6    | Known |
| MLX      | Known |
| MMP17    | Known |
| MORF4L1  | Known |
| MORN4    | Known |
| MPDZ     | Known |
| MPP3     | Known |
| MPPED1   | Known |
| MRFAP1L1 | Known |

|         |          |       |
|---------|----------|-------|
| GOLGA2  | PPP1R16B | Known |
| GPM6A   | PAM16    | Known |
| GPM6A   | PRKCA    | Known |
| GPS1    | CUL3     | Known |
| GRB10   | GIGYF2   | Known |
| GRIN1   | GRIN2A   | Known |
| GRIN2A  | AP1M1    | Known |
| GRIN2A  | AP4M1    | Known |
| GRIN2A  | ARHGAP32 | Known |
| GRIN2A  | CASK     | Known |
| GRIN2A  | DLGAP1   | Known |
| GRIN2A  | GRIN3A   | Known |
| GRIN2A  | GRIN3B   | Known |
| GRIN2A  | IL16     | Known |
| GRIN2A  | INADL    | Known |
| GRIN2A  | NEDD4    | Known |
| GRIN2A  | PLCG1    | Known |
| GRIN2A  | PRKCA    | Known |
| GRIN2A  | PTPN4    | Known |
| GRIN2A  | RGS3     | Known |
| GRIN2A  | SPTAN1   | Known |
| GRIN2A  | SRC      | Known |
| GRM3    | GRASP    | Known |
| GRM3    | GRIP1    | Known |
| GRM3    | PICK1    | Known |
| GRM3    | PPM1A    | Known |
| GRM3    | SDCBP    | Known |
| GSK3B   | AKT3     | Known |
| GTF2E1  | SRPK2    | Known |
| HCN2    | HCN1     | Known |
| HDAC1   | MAD1L1   | Known |
| HDAC1   | SATB2    | Known |
| HDAC2   | MAD1L1   | Known |
| HIC1    | TCF4     | Known |
| HIST3H3 | KDM3B    | Known |
| HLA-DMB | CUL3     | Known |
| HNRNPC  | SRPK2    | Known |
| HNRNPD  | IMMP2L   | Known |
| HSF2    | CUL3     | Known |
| HSPB1   | PRKD1    | Known |
| HTR2A   | ANKS1B   | Known |
| HTR2A   | EIF3F    | Known |
| HTR2A   | JAK2     | Known |
| HTR2A   | MAP1A    | Known |
| HTR2A   | MRPL28   | Known |
| HTR2A   | NDUFB10  | Known |
| HTR2A   | NME3     | Known |

|         |       |
|---------|-------|
| MRPL10  | Known |
| MRPL28  | Known |
| MRPS6   | Known |
| MS4A2   | Known |
| MSC     | Known |
| MSRB3   | Known |
| MST1R   | Known |
| MT2A    | Known |
| MT2P1   | Known |
| MTA2    | Known |
| MTCP1   | Known |
| MTOR    | Known |
| MUC1    | Known |
| MUC7    | Known |
| MUL1    | Known |
| MVP     | Known |
| MXD1    | Known |
| MYO1A   | Known |
| MYO5B   | Known |
| MYOD1   | Known |
| MYT1L   | Known |
| NBEA    | Known |
| NCAM1   | Known |
| NCK1    | Known |
| NCK2    | Known |
| NCOA4   | Known |
| NCOR2   | Known |
| NCS1    | Known |
| NDC80   | Known |
| NDE1    | Known |
| NDEL1   | Known |
| NDN     | Known |
| NDOR1   | Known |
| NDRG1   | Known |
| NDUFB10 | Known |
| NEBL    | Known |
| NECAP1  | Known |
| NEDD4   | Known |
| NEDD4L  | Known |
| NEDD8   | Known |
| NEDD9   | Known |
| NEFL    | Known |
| NEFM    | Known |
| NEK2    | Known |
| NEK6    | Known |
| NEK8    | Known |
| NELFE   | Known |

|          |          |       |
|----------|----------|-------|
| HTR2A    | NTRK3    | Known |
| HTR2A    | PON2     | Known |
| HTR2A    | PPP5C    | Known |
| HTR2A    | RPS6KA3  | Known |
| ID1      | TCF4     | Known |
| ID2      | TCF4     | Known |
| ID3      | TCF4     | Known |
| ID4      | TCF4     | Known |
| IFNG     | TNF      | Known |
| IGF1R    | PRKD1    | Known |
| IKZF3    | PPP1R16B | Known |
| IMMT     | DISC1    | Known |
| INS      | TCF4     | Known |
| IPO5     | DTNBP1   | Known |
| ITSN1    | DISC1    | Known |
| JUN      | PRKD1    | Known |
| JUN      | TCF20    | Known |
| JUN      | TCF4     | Known |
| JUP      | TCF4     | Known |
| KALRN    | DISC1    | Known |
| KALRN    | DTNBP1   | Known |
| KCNN2    | SRPK2    | Known |
| KDM3B    | ZNF512B  | Known |
| KHDRBS1  | MPP6     | Known |
| KIAA0408 | DTNBP1   | Known |
| KIF3A    | DISC1    | Known |
| KIF3C    | DISC1    | Known |
| KIFAP3   | DISC1    | Known |
| KIFC3    | DTNBP1   | Known |
| KRIT1    | RGS4     | Known |
| LASP1    | TCF4     | Known |
| LIN7A    | MPP6     | Known |
| LMO1     | TCF4     | Known |
| LNPEP    | TCF4     | Known |
| LYL1     | TCF4     | Known |
| LYN      | TNF      | Known |
| MACF1    | DISC1    | Known |
| MACF1    | DTNBP1   | Known |
| MAD1L1   | AMOTL2   | Known |
| MAD1L1   | BAG5     | Known |
| MAD1L1   | CCDC94   | Known |
| MAD1L1   | CCHCR1   | Known |
| MAD1L1   | CWF19L2  | Known |
| MAD1L1   | FAM131C  | Known |
| MAD1L1   | HAUS1    | Known |
| MAD1L1   | LGALS1   | Known |
| MAD1L1   | NDC80    | Known |

|          |       |
|----------|-------|
| NEU4     | Known |
| NEUROD1  | Known |
| NEUROG1  | Known |
| NF2      | Known |
| NFKB1    | Known |
| NFKBIA   | Known |
| NGLY1    | Known |
| NINL     | Known |
| NME3     | Known |
| NME7     | Known |
| NMUR2    | Known |
| NOL9     | Known |
| NONO     | Known |
| NOP16    | Known |
| NOS3     | Known |
| NOTCH1   | Known |
| NOTCH2NL | Known |
| NPM2     | Known |
| NR2C2AP  | Known |
| NR2E1    | Known |
| NR2F1    | Known |
| NR2F2    | Known |
| NR4A1    | Known |
| NSF      | Known |
| NSMCE4A  | Known |
| NSRP1    | Known |
| NTF3     | Known |
| NTRK2    | Known |
| NTRK3    | Known |
| NUDT10   | Known |
| NUF2     | Known |
| NUP160   | Known |
| NUP50    | Known |
| NXT2     | Known |
| OCEL1    | Known |
| OGT      | Known |
| OLFM1    | Known |
| OLIG2    | Known |
| ORC4     | Known |
| OSGIN1   | Known |
| OTUD4    | Known |
| P4HA3    | Known |
| PABPC4   | Known |
| PAFAH1B1 | Known |
| PAK1     | Known |
| PAK4     | Known |
| PAM16    | Known |

|        |          |       |
|--------|----------|-------|
| MAD1L1 | NEBL     | Known |
| MAD1L1 | NINL     | Known |
| MAD1L1 | RNF8     | Known |
| MAD1L1 | SIN3A    | Known |
| MAD1L1 | SIN3B    | Known |
| MAD1L1 | SPATA2   | Known |
| MAD1L1 | TEX11    | Known |
| MAD1L1 | TRIM29   | Known |
| MAD1L1 | TSHZ3    | Known |
| MAD1L1 | TUBGCP4  | Known |
| MAD1L1 | USP15    | Known |
| MAD1L1 | ZSCAN32  | Known |
| MAD2L1 | MAD1L1   | Known |
| MAGEB1 | SRPK2    | Known |
| MAN2A1 | SEC23B   | Known |
| MAP1A  | DISC1    | Known |
| MAP2K7 | VRK2     | Known |
| MAP3K7 | VRK2     | Known |
| MAPK14 | PAK6     | Known |
| MAPK14 | TCF20    | Known |
| MATN3  | TCF4     | Known |
| MATR3  | DISC1    | Known |
| MAX    | MAD1L1   | Known |
| MBD3   | BCL11B   | Known |
| MCM7   | NAB2     | Known |
| MDFI   | ADAMTSL3 | Known |
| MDFI   | NAB2     | Known |
| MDK    | SRPK2    | Known |
| MDM2   | PAK6     | Known |
| MEN1   | TCF4     | Known |
| MFAP1  | MAD1L1   | Known |
| MLLT10 | DISC1    | Known |
| MLLT6  | TCF4     | Known |
| MLX    | MAD1L1   | Known |
| MMP17  | TNF      | Known |
| MPP3   | SRPK2    | Known |
| MPP6   | ARHGAP18 | Known |
| MPP6   | DYNLRB1  | Known |
| MPP6   | EXOSC4   | Known |
| MPP6   | EXOSC5   | Known |
| MPP6   | EXOSC6   | Known |
| MPP6   | KNSTRN   | Known |
| MPPED1 | DISC1    | Known |
| MT2A   | PRKD1    | Known |
| MT2P1  | MPP6     | Known |
| MTA2   | BCL11B   | Known |
| MTA2   | SATB2    | Known |

|          |       |
|----------|-------|
| PARK2    | Known |
| PARN     | Known |
| PARP1    | Known |
| PATE1    | Known |
| PAWR     | Known |
| PBLD     | Known |
| PCBD1    | Known |
| PCMT1    | Known |
| PCNT     | Known |
| PCNXL4   | Known |
| PDCD4    | Known |
| PDE3B    | Known |
| PDE4B    | Known |
| PDE4DIP  | Known |
| PDE7B    | Known |
| PDIA2    | Known |
| PDIK1L   | Known |
| PDK2     | Known |
| PDPK1    | Known |
| PDZK1    | Known |
| PEA15    | Known |
| PELI1    | Known |
| PEX5     | Known |
| PFKFB1   | Known |
| PFKFB2   | Known |
| PGK1     | Known |
| PHB2     | Known |
| PHC2     | Known |
| PHF1     | Known |
| PHOSPHO2 | Known |
| PI4K2B   | Known |
| PIAS1    | Known |
| PIAS2    | Known |
| PICK1    | Known |
| PIK3R1   | Known |
| PIN1     | Known |
| PKN2     | Known |
| PLCB1    | Known |
| PLCG1    | Known |
| PLCG2    | Known |
| PLEKHA6  | Known |
| PLEKHN1  | Known |
| PLEKHO1  | Known |
| PLN      | Known |
| PLSCR1   | Known |
| PLTP     | Known |
| PLXNA1   | Known |

|        |           |       |
|--------|-----------|-------|
| MTHFR  | LSM8      | Known |
| MTOR   | AMBRA1    | Known |
| MUC1   | GALNT10   | Known |
| MUC7   | GALNT10   | Known |
| MVP    | DISC1     | Known |
| MYO1A  | DISC1     | Known |
| MYO5B  | TCF4      | Known |
| MYOD1  | TCF4      | Known |
| MYT1L  | DISC1     | Known |
| NAB2   | CCDC33    | Known |
| NAB2   | CCHCR1    | Known |
| NAB2   | CWF19L2   | Known |
| NAB2   | DGCR6     | Known |
| NAB2   | GCC1      | Known |
| NAB2   | JAKMIP2   | Known |
| NAB2   | KRT40     | Known |
| NAB2   | KRTAP10-3 | Known |
| NAB2   | KRTAP10-8 | Known |
| NAB2   | LENG1     | Known |
| NAB2   | MAPK3     | Known |
| NAB2   | MORF4L1   | Known |
| NAB2   | NEDD9     | Known |
| NAB2   | NME7      | Known |
| NAB2   | NOTCH2NL  | Known |
| NAB2   | PHF1      | Known |
| NAB2   | PHOSPHO2  | Known |
| NAB2   | PIN1      | Known |
| NAB2   | RBPMS     | Known |
| NAB2   | RFC5      | Known |
| NAB2   | SCNM1     | Known |
| NAB2   | SUMO1P1   | Known |
| NAB2   | TCEANC    | Known |
| NAB2   | TCHP      | Known |
| NAB2   | TGIF2LY   | Known |
| NAB2   | TTC19     | Known |
| NAB2   | ZBED8     | Known |
| NAB2   | ZMYND19   | Known |
| NBEA   | DTNBP1    | Known |
| NDN    | DTNBP1    | Known |
| NDN    | MPP6      | Known |
| NEDD4  | AKT3      | Known |
| NEDD4  | PRRG2     | Known |
| NEDD4  | SLC6A3    | Known |
| NEDD4L | CYP26B1   | Known |
| NEDD8  | CUL3      | Known |
| NEFL   | PPP1R16B  | Known |
| NEFM   | DISC1     | Known |

|          |       |
|----------|-------|
| POLB     | Known |
| POLR1A   | Known |
| POLR1C   | Known |
| PON2     | Known |
| POT1     | Known |
| POU2F1   | Known |
| PPARD    | Known |
| PPARGC1B | Known |
| PPIA     | Known |
| PPID     | Known |
| PPIL1    | Known |
| PPL      | Known |
| PPM1A    | Known |
| PPM1E    | Known |
| PPP1CA   | Known |
| PPP1CC   | Known |
| PPP1R14A | Known |
| PPP1R18  | Known |
| PPP1R9B  | Known |
| PPP2CA   | Known |
| PPP2R1A  | Known |
| PPP2R4   | Known |
| PPP4R1   | Known |
| PPP5C    | Known |
| PRAM1    | Known |
| PRDX2    | Known |
| PRG2     | Known |
| PRKAA1   | Known |
| PRKAA2   | Known |
| PRKAB2   | Known |
| PRKACA   | Known |
| PRKCA    | Known |
| PRKCB    | Known |
| PRKCD    | Known |
| PRKCE    | Known |
| PRKCG    | Known |
| PRKCH    | Known |
| PRKCQ    | Known |
| PRKCZ    | Known |
| PRKDC    | Known |
| PRNP     | Known |
| PRPF38A  | Known |
| PRPF40A  | Known |
| PRRC2A   | Known |
| PRRC2B   | Known |
| PRTN3    | Known |
| PSEN1    | Known |

|          |          |       |
|----------|----------|-------|
| NEK2     | MAD1L1   | Known |
| NEK6     | PAK6     | Known |
| NEUROD1  | TCF4     | Known |
| NEUROG1  | TCF4     | Known |
| NFATC3   | MAPK8    | Known |
| NFATC3   | MAPK9    | Known |
| NFATC3   | TTF1     | Known |
| NFKB1    | MPP6     | Known |
| NFKBIA   | TNF      | Known |
| NONO     | MAD1L1   | Known |
| NOTCH4   | DLL4     | Known |
| NOTCH4   | EGFL7    | Known |
| NOTCH4   | FBXW7    | Known |
| NOTCH4   | MAML1    | Known |
| NOTCH4   | MAML2    | Known |
| NOTCH4   | MAML3    | Known |
| NOTCH4   | PSEN1    | Known |
| NOTCH4   | PSEN2    | Known |
| NOTCH4   | TCEB1    | Known |
| NR2F1    | BCL11B   | Known |
| NR2F2    | BCL11B   | Known |
| NR4A1    | TCF4     | Known |
| NRG1     | ADAM19   | Known |
| NRG1     | IKZF4    | Known |
| NRG1     | LIMK1    | Known |
| NRGN     | PRKCA    | Known |
| NRGN     | PRKCB    | Known |
| NRGN     | PRKCG    | Known |
| NUF2     | DTNBP1   | Known |
| NUP160   | DISC1    | Known |
| OGT      | SNAP91   | Known |
| OLFM1    | DISC1    | Known |
| ORC4     | TCF4     | Known |
| PAFAH1B1 | DISC1    | Known |
| PAK6     | RHOJ     | Known |
| PARK2    | TCF4     | Known |
| PARN     | MPP6     | Known |
| PARP1    | TCF4     | Known |
| PCNT     | DISC1    | Known |
| PDE4B    | DISC1    | Known |
| PDPK1    | AKT3     | Known |
| PGK1     | DISC1    | Known |
| PHC2     | PPP1R16B | Known |
| PIAS1    | SATB2    | Known |
| PIN1     | TCF4     | Known |
| PLCG1    | PRKD1    | Known |
| PLCG1    | SNAP91   | Known |

|         |       |
|---------|-------|
| PSEN2   | Known |
| PSMA1   | Known |
| PSMA3   | Known |
| PSME3   | Known |
| PSMG2   | Known |
| PTAFR   | Known |
| PTBP1   | Known |
| PTEN    | Known |
| PTF1A   | Known |
| PTGER3  | Known |
| PTGES3  | Known |
| PTGS1   | Known |
| PTGS2   | Known |
| PTK2B   | Known |
| PTPN1   | Known |
| PTPN4   | Known |
| RAB11A  | Known |
| RAB3D   | Known |
| RAB3IL1 | Known |
| RAB41   | Known |
| RABGAP1 | Known |
| RABIF   | Known |
| RAC1    | Known |
| RAD21   | Known |
| RAF1    | Known |
| RANBP9  | Known |
| RARA    | Known |
| RASA1   | Known |
| RASA3   | Known |
| RASSF7  | Known |
| RBBP4   | Known |
| RBBP7   | Known |
| RBFOX2  | Known |
| RBM12   | Known |
| RBM15   | Known |
| RBM23   | Known |
| RBM39   | Known |
| RBM8A   | Known |
| RBPJ    | Known |
| RBPMS   | Known |
| RBSN    | Known |
| RBX1    | Known |
| RC3H1   | Known |
| RCBTB1  | Known |
| RCBTB2  | Known |
| RDX     | Known |
| RECK    | Known |

|          |           |       |
|----------|-----------|-------|
| PLCG2    | PRKD1     | Known |
| POLB     | SRPK2     | Known |
| POU2F1   | TNF       | Known |
| PPARD    | SHMT2     | Known |
| PPIA     | SRPK2     | Known |
| PPIA     | TCF4      | Known |
| PPM1E    | DISC1     | Known |
| PPP1CC   | SMG6      | Known |
| PPP1R16B | CDCA7L    | Known |
| PPP1R16B | CEP55     | Known |
| PPP1R16B | CEP70     | Known |
| PPP1R16B | FAM208B   | Known |
| PPP1R16B | KCTD9     | Known |
| PPP3CC   | CABIN1    | Known |
| PPP3CC   | HAX1      | Known |
| PPP3CC   | ITPKC     | Known |
| PPP3CC   | SDC2      | Known |
| PPP3CC   | TGFBR1    | Known |
| PPP3CC   | THAP7     | Known |
| PPP4R1   | DISC1     | Known |
| PPP5C    | DISC1     | Known |
| PRKAA1   | SRPK2     | Known |
| PRKAA2   | TCF4      | Known |
| PRKAB2   | TCF4      | Known |
| PRKCD    | AKT3      | Known |
| PRKCE    | PRKD1     | Known |
| PRKCH    | PRKD1     | Known |
| PRKCZ    | AKT3      | Known |
| PRKD1    | ADAP1     | Known |
| PRKD1    | AKAP13    | Known |
| PRKD1    | COPS2     | Known |
| PRKD1    | COPS5     | Known |
| PRKD1    | COPS7A    | Known |
| PRKD1    | GNB2L1    | Known |
| PRKD1    | HDAC5     | Known |
| PRKD1    | HDAC7     | Known |
| PRKD1    | IBTK      | Known |
| PRKD1    | KIDINS220 | Known |
| PRKD1    | MAPK8     | Known |
| PRKD1    | MAPK9     | Known |
| PRKD1    | PPP1R14A  | Known |
| PRKD1    | SRC       | Known |
| PRKD1    | SYK       | Known |
| PRKD1    | TP53      | Known |
| PRKD1    | YWHAQ     | Known |
| PRKD1    | YWHAZ     | Known |
| PRRG2    | FATE1     | Known |

|          |       |
|----------|-------|
| RELA     | Known |
| REM1     | Known |
| REXO1L6P | Known |
| RFC5     | Known |
| RGCC     | Known |
| RGS2     | Known |
| RGS3     | Known |
| RHEB     | Known |
| RHEBL1   | Known |
| RHOBTB3  | Known |
| RHOJ     | Known |
| RICTOR   | Known |
| RIMS1    | Known |
| RIPK1    | Known |
| RIT1     | Known |
| RIT2     | Known |
| RNF11    | Known |
| RNF115   | Known |
| RNF138   | Known |
| RNF2     | Known |
| RNF32    | Known |
| RNF4     | Known |
| RNF7     | Known |
| RNF8     | Known |
| RNPS1    | Known |
| ROGDI    | Known |
| RPL22    | Known |
| RPL39L   | Known |
| RPL4     | Known |
| RPL41    | Known |
| RPS20    | Known |
| RPS6KA3  | Known |
| RPS6KB1  | Known |
| RQCD1    | Known |
| RSPH14   | Known |
| RSRC1    | Known |
| RSRC2    | Known |
| RSRP1    | Known |
| RTF1     | Known |
| RUNX1T1  | Known |
| RWDD2B   | Known |
| RYR2     | Known |
| S100A1   | Known |
| S1PR1    | Known |
| SCARB1   | Known |
| SCNM1    | Known |
| SCOC     | Known |

|         |           |       |
|---------|-----------|-------|
| PRTN3   | TNF       | Known |
| PSEN1   | TCF4      | Known |
| PSMA1   | MAD1L1    | Known |
| PSMA1   | TCF4      | Known |
| PSMA3   | SRPK2     | Known |
| PSME3   | DTNBP1    | Known |
| PTAFR   | RGS4      | Known |
| PTBP1   | SRPK2     | Known |
| PTGER3  | TCF4      | Known |
| PTGIS   | PTGS1     | Known |
| PTGIS   | PTGS2     | Known |
| PTK2B   | GRIN2A    | Known |
| RAB11A  | DTNBP1    | Known |
| RAB3IL1 | SATB2     | Known |
| RABGAP1 | DISC1     | Known |
| RABIF   | TCF4      | Known |
| RAD21   | DISC1     | Known |
| RAD21   | STAG1     | Known |
| RANBP9  | DISC1     | Known |
| RASSF7  | DISC1     | Known |
| RBBP4   | BCL11B    | Known |
| RBBP7   | BCL11B    | Known |
| RBM12   | GIGYF2    | Known |
| RBPJ    | NOTCH4    | Known |
| RBSN    | DTNBP1    | Known |
| RCBTB2  | CUL3      | Known |
| RELA    | TCF4      | Known |
| RERE    | ALG13     | Known |
| RERE    | ATN1      | Known |
| RERE    | CBFA2T2   | Known |
| RERE    | ECM1      | Known |
| RERE    | EFEMP1    | Known |
| RERE    | EFEMP2    | Known |
| RERE    | EHMT2     | Known |
| RERE    | HIST2H3C  | Known |
| RERE    | KAT6A     | Known |
| RERE    | KRTAP4-12 | Known |
| RERE    | LZTR1     | Known |
| RERE    | NR2E1     | Known |
| RERE    | PLSCR1    | Known |
| RERE    | PRRC2A    | Known |
| RERE    | PRRC2B    | Known |
| RERE    | PSMA3     | Known |
| RERE    | RBFOX2    | Known |
| RERE    | TRIM22    | Known |
| RERE    | TRIP6     | Known |
| RERE    | ZMYND8    | Known |

|          |       |
|----------|-------|
| SDC2     | Known |
| SDCBP    | Known |
| SDR42E1  | Known |
| SEC14L4  | Known |
| SEC23B   | Known |
| SEMA3B   | Known |
| SETDB1   | Known |
| SF3B4    | Known |
| SFR1     | Known |
| SH2B2    | Known |
| SH3BP5   | Known |
| SH3RF1   | Known |
| SHKBP1   | Known |
| SIGLEC6  | Known |
| SIN3A    | Known |
| SIN3B    | Known |
| SIRT1    | Known |
| SIRT6    | Known |
| SKI      | Known |
| SKIV2L2  | Known |
| SKP2     | Known |
| SLAIN2   | Known |
| SLC39A13 | Known |
| SLC4A1AP | Known |
| SLC9A3R1 | Known |
| SMAD1    | Known |
| SMAD2    | Known |
| SMAD3    | Known |
| SMAD4    | Known |
| SMAD7    | Known |
| SMAD9    | Known |
| SMARCA4  | Known |
| SMARCB1  | Known |
| SMARCC1  | Known |
| SMARCE1  | Known |
| SMC2     | Known |
| SMC3     | Known |
| SMCP     | Known |
| SMG5     | Known |
| SMOC1    | Known |
| SNAPIN   | Known |
| SNCA     | Known |
| SNIP1    | Known |
| SNRNP27  | Known |
| SNRNP35  | Known |
| SNRNP70  | Known |
| SNRPB    | Known |



|         |          |       |
|---------|----------|-------|
| RGS4    | COPB2    | Known |
| RGS4    | PLCB1    | Known |
| RGS6    | DMAP1    | Known |
| RGS6    | GNB5     | Known |
| RGS6    | STMN2    | Known |
| RIT1    | CUL3     | Known |
| RIT1    | SRPK2    | Known |
| RIT2    | SRPK2    | Known |
| RNF2    | AMBRA1   | Known |
| RNF4    | SRPK2    | Known |
| RNF4    | TCF20    | Known |
| RPL22   | SRPK2    | Known |
| RPL41   | SRPK2    | Known |
| RPS20   | MPP6     | Known |
| RQCD1   | GIGYF2   | Known |
| RUNX1T1 | TCF4     | Known |
| SDCBP   | DTNBP1   | Known |
| SEMA3B  | PAK6     | Known |
| SF3B4   | PPP1R16B | Known |
| SH3BP5  | DISC1    | Known |
| SHMT2   | ARL6IP1  | Known |
| SHMT2   | CMTM5    | Known |
| SHMT2   | NDRG1    | Known |
| SIGLEC6 | TCF4     | Known |
| SKIV2L2 | MPP6     | Known |
| SLC6A3  | GNB2L1   | Known |
| SLC6A3  | PICK1    | Known |
| SLC6A3  | SNCA     | Known |
| SLC6A3  | SNTA1    | Known |
| SLC6A3  | STX1A    | Known |
| SLC6A3  | TGFB111  | Known |
| SLC6A4  | STX1A    | Known |
| SMAD1   | TCF20    | Known |
| SMAD2   | NOTCH4   | Known |
| SMAD2   | STAG1    | Known |
| SMAD3   | NOTCH4   | Known |
| SMAD4   | NOTCH4   | Known |
| SMAD9   | STAG1    | Known |
| SMARCA4 | MPP6     | Known |
| SMARCE1 | DISC1    | Known |
| SMC2    | DISC1    | Known |
| SMC3    | DISC1    | Known |
| SMCP    | TCF4     | Known |
| SMG6    | SMG5     | Known |
| SNAP91  | NECAP1   | Known |
| SNAP91  | TRAF3IP1 | Known |
| SNAP91  | TUBA1B   | Known |

|          |       |
|----------|-------|
| SNTA1    | Known |
| SNURF    | Known |
| SNX2     | Known |
| SNX6     | Known |
| SNX9     | Known |
| SORBS2   | Known |
| SORBS3   | Known |
| SORT1    | Known |
| SP1      | Known |
| SPAG8    | Known |
| SPARCL1  | Known |
| SPATA2   | Known |
| SPATC1L  | Known |
| SPG21    | Known |
| SPP1     | Known |
| SPTAN1   | Known |
| SPTBN1   | Known |
| SPTBN4   | Known |
| SRC      | Known |
| SREK1    | Known |
| SRGAP2   | Known |
| SRGAP3   | Known |
| SRI      | Known |
| SRRM1    | Known |
| SRSF1    | Known |
| SRSF12   | Known |
| SRSF2    | Known |
| SRSF3    | Known |
| SRSF5    | Known |
| SRSF7    | Known |
| SRSF8    | Known |
| SRSF9    | Known |
| SSC5D    | Known |
| SSTR5    | Known |
| ST13     | Known |
| STAG2    | Known |
| STAMBPL1 | Known |
| STAT1    | Known |
| STAT3    | Known |
| STK16    | Known |
| STK3     | Known |
| STK4     | Known |
| STMN2    | Known |
| STON1    | Known |
| STX11    | Known |
| STX18    | Known |
| STX1A    | Known |

|         |          |       |
|---------|----------|-------|
| SNAPIN  | DTNBP1   | Known |
| SNRNP70 | SRPK2    | Known |
| SNRPB   | GIGYF2   | Known |
| SNX2    | PAK6     | Known |
| SNX9    | MPP6     | Known |
| SP1     | BCL11B   | Known |
| SPAG8   | KDM3B    | Known |
| SPARCL1 | DISC1    | Known |
| SPP1    | ZNF804A  | Known |
| SPTAN1  | DISC1    | Known |
| SPTBN1  | DISC1    | Known |
| SRGAP2  | DISC1    | Known |
| SRGAP3  | DISC1    | Known |
| SRGAP3  | DTNBP1   | Known |
| SRI     | SRPK2    | Known |
| SRPK2   | MAR10    | Known |
| SRPK2   | ACIN1    | Known |
| SRPK2   | ADGRG5   | Known |
| SRPK2   | AHCYL1   | Known |
| SRPK2   | ALKBH3   | Known |
| SRPK2   | AMMECR1L | Known |
| SRPK2   | APOBEC3C | Known |
| SRPK2   | ARGLU1   | Known |
| SRPK2   | ARHGAP12 | Known |
| SRPK2   | ARL6IP4  | Known |
| SRPK2   | ARPC1B   | Known |
| SRPK2   | ATAT1    | Known |
| SRPK2   | AURKA    | Known |
| SRPK2   | BAIAP2   | Known |
| SRPK2   | BRD3     | Known |
| SRPK2   | C16orf78 | Known |
| SRPK2   | C17orf85 | Known |
| SRPK2   | C18orf25 | Known |
| SRPK2   | C1orf35  | Known |
| SRPK2   | C4orf46  | Known |
| SRPK2   | CACNG2   | Known |
| SRPK2   | CAND1    | Known |
| SRPK2   | CASK     | Known |
| SRPK2   | CBLN4    | Known |
| SRPK2   | CBX5     | Known |
| SRPK2   | CCDC28A  | Known |
| SRPK2   | CCDC97   | Known |
| SRPK2   | CCM2     | Known |
| SRPK2   | CDC42EP4 | Known |
| SRPK2   | CHERP    | Known |
| SRPK2   | CHTOP    | Known |
| SRPK2   | CLDN19   | Known |

|           |       |
|-----------|-------|
| SUMO1P1   | Known |
| SUMO2     | Known |
| SUMO3     | Known |
| SUPT16H   | Known |
| SUV39H1   | Known |
| SVIL      | Known |
| SYBU      | Known |
| SYK       | Known |
| SYNE1     | Known |
| SZT2      | Known |
| TADA2A    | Known |
| TAF7L     | Known |
| TAL1      | Known |
| TAL2      | Known |
| TAPBPL    | Known |
| TBC1D4    | Known |
| TCEA2     | Known |
| TCEANC    | Known |
| TCEB1     | Known |
| TCF3      | Known |
| TCHP      | Known |
| TCL1A     | Known |
| TCL1B     | Known |
| TCL6      | Known |
| TCOF1     | Known |
| TCP1      | Known |
| TDP2      | Known |
| TERF1     | Known |
| TERF2IP   | Known |
| TERT      | Known |
| TEX11     | Known |
| TFIP11    | Known |
| TGFB11    | Known |
| TGFBR1    | Known |
| TGIF2LY   | Known |
| THAP7     | Known |
| THEM4     | Known |
| THOP1     | Known |
| TIAM2     | Known |
| TLE1      | Known |
| TLE4      | Known |
| TMEM213   | Known |
| TNFAIP1   | Known |
| TNFAIP3   | Known |
| TNFRSF10C | Known |
| TNFRSF1A  | Known |
| TNFRSF1B  | Known |

|       |           |       |
|-------|-----------|-------|
| SRPK2 | CSAG1     | Known |
| SRPK2 | CTNNBL1   | Known |
| SRPK2 | DAW1      | Known |
| SRPK2 | DBF4B     | Known |
| SRPK2 | DDX21     | Known |
| SRPK2 | DDX46     | Known |
| SRPK2 | DNAJC8    | Known |
| SRPK2 | DRAP1     | Known |
| SRPK2 | EGLN2     | Known |
| SRPK2 | EIF1AY    | Known |
| SRPK2 | ENOX2     | Known |
| SRPK2 | EPB41L4A  | Known |
| SRPK2 | EPS8L3    | Known |
| SRPK2 | EVI5L     | Known |
| SRPK2 | FAM76B    | Known |
| SRPK2 | FAM90A1   | Known |
| SRPK2 | FXR2      | Known |
| SRPK2 | GABARAP   | Known |
| SRPK2 | GABARAPL1 | Known |
| SRPK2 | HBS1L     | Known |
| SRPK2 | HIRIP3    | Known |
| SRPK2 | HMGN3     | Known |
| SRPK2 | HOMER3    | Known |
| SRPK2 | IFIT5     | Known |
| SRPK2 | LCA5      | Known |
| SRPK2 | LCE3D     | Known |
| SRPK2 | LRRN4CL   | Known |
| SRPK2 | LUC7L     | Known |
| SRPK2 | LUC7L2    | Known |
| SRPK2 | LUC7L3    | Known |
| SRPK2 | LUZP4     | Known |
| SRPK2 | MAB21L2   | Known |
| SRPK2 | MAPKAPK5  | Known |
| SRPK2 | MCOLN3    | Known |
| SRPK2 | MRPS6     | Known |
| SRPK2 | NCK2      | Known |
| SRPK2 | NELFE     | Known |
| SRPK2 | NGLY1     | Known |
| SRPK2 | NOP16     | Known |
| SRPK2 | NPM2      | Known |
| SRPK2 | NSMCE4A   | Known |
| SRPK2 | NSRP1     | Known |
| SRPK2 | NUP50     | Known |
| SRPK2 | NXT2      | Known |
| SRPK2 | OCEL1     | Known |
| SRPK2 | PABPC4    | Known |
| SRPK2 | PAK4      | Known |

|          |       |
|----------|-------|
| TNFSF11  | Known |
| TNIK     | Known |
| TNIP2    | Known |
| TNKS     | Known |
| TOPBP1   | Known |
| TP53     | Known |
| TPD52    | Known |
| TPD52L1  | Known |
| TPM1     | Known |
| TPM3     | Known |
| TPR      | Known |
| TRA2A    | Known |
| TRA2B    | Known |
| TRADD    | Known |
| TRAF2    | Known |
| TRAF3IP1 | Known |
| TRAF6    | Known |
| TRAPPC2L | Known |
| TRIB3    | Known |
| TRIM13   | Known |
| TRIM2    | Known |
| TRIM22   | Known |
| TRIM27   | Known |
| TRIM28   | Known |
| TRIM29   | Known |
| TRIM32   | Known |
| TRIM41   | Known |
| TRIM9    | Known |
| TRIO     | Known |
| TRIP13   | Known |
| TRIP6    | Known |
| TSC1     | Known |
| TSC2     | Known |
| TSC22D3  | Known |
| TSHZ3    | Known |
| TSSC4    | Known |
| TSSK3    | Known |
| TTC19    | Known |
| TTC3     | Known |
| TTF1     | Known |
| TTN      | Known |
| TUBA1B   | Known |
| TUBB     | Known |
| TUBB2A   | Known |
| TUBGCP4  | Known |
| TWIST1   | Known |
| TWIST2   | Known |

|       |           |       |
|-------|-----------|-------|
| SRPK2 | PDE7B     | Known |
| SRPK2 | PELI1     | Known |
| SRPK2 | PPIL1     | Known |
| SRPK2 | PRPF38A   | Known |
| SRPK2 | PRPF40A   | Known |
| SRPK2 | RBM15     | Known |
| SRPK2 | RBM23     | Known |
| SRPK2 | RBM39     | Known |
| SRPK2 | RBM8A     | Known |
| SRPK2 | RNPS1     | Known |
| SRPK2 | RPL39L    | Known |
| SRPK2 | RSRC1     | Known |
| SRPK2 | RSRC2     | Known |
| SRPK2 | RSRP1     | Known |
| SRPK2 | RTF1      | Known |
| SRPK2 | RWDD2B    | Known |
| SRPK2 | SDR42E1   | Known |
| SRPK2 | SEC23B    | Known |
| SRPK2 | SLAIN2    | Known |
| SRPK2 | SNIP1     | Known |
| SRPK2 | SNRNP27   | Known |
| SRPK2 | SNRNP35   | Known |
| SRPK2 | SNURF     | Known |
| SRPK2 | SREK1     | Known |
| SRPK2 | SRRM1     | Known |
| SRPK2 | SRSF12    | Known |
| SRPK2 | SRSF8     | Known |
| SRPK2 | SRSF9     | Known |
| SRPK2 | STON1     | Known |
| SRPK2 | SUPT16H   | Known |
| SRPK2 | TAF7L     | Known |
| SRPK2 | TCOF1     | Known |
| SRPK2 | TDP2      | Known |
| SRPK2 | TLE4      | Known |
| SRPK2 | TNFRSF10C | Known |
| SRPK2 | TNIP2     | Known |
| SRPK2 | TPD52     | Known |
| SRPK2 | TRA2A     | Known |
| SRPK2 | TRIM41    | Known |
| SRPK2 | TTN       | Known |
| SRPK2 | U2AF1     | Known |
| SRPK2 | U2AF2     | Known |
| SRPK2 | UBD       | Known |
| SRPK2 | UBE2E2    | Known |
| SRPK2 | VAV2      | Known |
| SRPK2 | VIMP      | Known |
| SRPK2 | VRK1      | Known |

|         |       |
|---------|-------|
| TXLNB   | Known |
| TXNL4B  | Known |
| TYRO3   | Known |
| U2AF1   | Known |
| U2AF2   | Known |
| UBC     | Known |
| UBD     | Known |
| UBE2D1  | Known |
| UBE2D2  | Known |
| UBE2D3  | Known |
| UBE2E1  | Known |
| UBE2E2  | Known |
| UBE2E3  | Known |
| UBE2M   | Known |
| UBE2S   | Known |
| UBQLN1  | Known |
| UBTF    | Known |
| USP15   | Known |
| USP4    | Known |
| USP48   | Known |
| UTP23   | Known |
| UTRN    | Known |
| UXS1    | Known |
| VAV2    | Known |
| VEGFA   | Known |
| VHL     | Known |
| VIM     | Known |
| VIMP    | Known |
| VKORC1  | Known |
| VLDLR   | Known |
| VPS28   | Known |
| VRK1    | Known |
| WBP11   | Known |
| WDR5    | Known |
| WFDC5   | Known |
| WNK1    | Known |
| WNK4    | Known |
| WNT7B   | Known |
| XIAP    | Known |
| XPNPEP1 | Known |
| XRCC5   | Known |
| XRCC6   | Known |
| XRN2    | Known |
| YAP1    | Known |
| YBX1    | Known |
| YPEL2   | Known |
| YPEL3   | Known |

|         |           |       |
|---------|-----------|-------|
| SRPK2   | WDR5      | Known |
| SRPK2   | YPEL2     | Known |
| SRPK2   | YPEL3     | Known |
| SRPK2   | YTHDC1    | Known |
| SRPK2   | YWHAB     | Known |
| SRPK2   | ZMAT4     | Known |
| SRPK2   | ZRANB2    | Known |
| SRPK2   | ZRSR2     | Known |
| SRPK2   | ZSCAN9    | Known |
| SRSF1   | SRPK2     | Known |
| SRSF2   | TCF4      | Known |
| SRSF3   | SRPK2     | Known |
| SRSF5   | SRPK2     | Known |
| SRSF7   | SRPK2     | Known |
| STAG1   | STAG2     | Known |
| STAG1   | WFDC5     | Known |
| SUMO2   | CUL3      | Known |
| SUMO3   | CUL3      | Known |
| SUV39H1 | BCL11B    | Known |
| SVIL    | MPHOSPH9  | Known |
| SYBU    | DTNBP1    | Known |
| SYNE1   | DISC1     | Known |
| SYNE1   | DTNBP1    | Known |
| TADA2A  | PPP1R16B  | Known |
| TAL1    | TCF4      | Known |
| TAL2    | TCF4      | Known |
| TCEA2   | TCF4      | Known |
| TCEB1   | CUL3      | Known |
| TCF20   | HIST2H2AC | Known |
| TCF20   | HIST2H2BE | Known |
| TCF4    | ARHGEF1   | Known |
| TCF4    | ARMC7     | Known |
| TCF4    | ASCL3     | Known |
| TCF4    | ASCL4     | Known |
| TCF4    | ASPSCR1   | Known |
| TCF4    | BCAS2     | Known |
| TCF4    | BZRAP1    | Known |
| TCF4    | C19orf66  | Known |
| TCF4    | C1orf109  | Known |
| TCF4    | C9orf171  | Known |
| TCF4    | CABP5     | Known |
| TCF4    | CCDC101   | Known |
| TCF4    | CDC73     | Known |
| TCF4    | CHAF1A    | Known |
| TCF4    | CHCHD2    | Known |
| TCF4    | CHIC2     | Known |
| TCF4    | DEF6      | Known |

|            |       |
|------------|-------|
| YTHDC1     | Known |
| YWHAB      | Known |
| YWHAE      | Known |
| YWHAG      | Known |
| YWHAQ      | Known |
| YWHAZ      | Known |
| ZBED8      | Known |
| ZDHHC17    | Known |
| ZDHHC24    | Known |
| ZFP36L1    | Known |
| ZHX1       | Known |
| ZMAT4      | Known |
| ZMYND19    | Known |
| ZMYND8     | Known |
| ZNF124     | Known |
| ZNF197     | Known |
| ZNF205-AS1 | Known |
| ZNF365     | Known |
| ZNF417     | Known |
| ZNF490     | Known |
| ZNF512B    | Known |
| ZNF558     | Known |
| ZNF587     | Known |
| ZNF746     | Known |
| ZNF775     | Known |
| ZRANB2     | Known |
| ZRSR2      | Known |
| ZSCAN32    | Known |
| ZSCAN9     | Known |

|      |          |       |
|------|----------|-------|
| TCF4 | DGCR6    | Known |
| TCF4 | DMRT3    | Known |
| TCF4 | EFHC1    | Known |
| TCF4 | EIF4E2   | Known |
| TCF4 | EPB41L3  | Known |
| TCF4 | EXOSC1   | Known |
| TCF4 | FAM124B  | Known |
| TCF4 | FAM74A4  | Known |
| TCF4 | FERD3L   | Known |
| TCF4 | FLAD1    | Known |
| TCF4 | FRS3     | Known |
| TCF4 | GLRX3    | Known |
| TCF4 | GOLGA8EP | Known |
| TCF4 | GOLGA8F  | Known |
| TCF4 | GORASP2  | Known |
| TCF4 | GTF3C5   | Known |
| TCF4 | GUCD1    | Known |
| TCF4 | HAND2    | Known |
| TCF4 | HAT1     | Known |
| TCF4 | HBP1     | Known |
| TCF4 | HSPB7    | Known |
| TCF4 | KCTD14   | Known |
| TCF4 | KLC3     | Known |
| TCF4 | KLHL32   | Known |
| TCF4 | LENG1    | Known |
| TCF4 | LGALS14  | Known |
| TCF4 | LMO4     | Known |
| TCF4 | MAD2L2   | Known |
| TCF4 | MAGOHB   | Known |
| TCF4 | MAPKBP1  | Known |
| TCF4 | MEMO1    | Known |
| TCF4 | MORN4    | Known |
| TCF4 | MRFAP1L1 | Known |
| TCF4 | MRPL10   | Known |
| TCF4 | MSC      | Known |
| TCF4 | MSRB3    | Known |
| TCF4 | MVP      | Known |
| TCF4 | NCK2     | Known |
| TCF4 | NDOR1    | Known |
| TCF4 | NEK6     | Known |
| TCF4 | NEK8     | Known |
| TCF4 | NEU4     | Known |
| TCF4 | NME7     | Known |
| TCF4 | NMUR2    | Known |
| TCF4 | NOL9     | Known |
| TCF4 | NR2C2AP  | Known |
| TCF4 | NUDT10   | Known |

|      |            |       |
|------|------------|-------|
| TCF4 | OSGIN1     | Known |
| TCF4 | OTUD4      | Known |
| TCF4 | PATE1      | Known |
| TCF4 | PBLD       | Known |
| TCF4 | PLEKHN1    | Known |
| TCF4 | POLR1A     | Known |
| TCF4 | POLR1C     | Known |
| TCF4 | PPIL1      | Known |
| TCF4 | PPP1R18    | Known |
| TCF4 | PSMG2      | Known |
| TCF4 | PTF1A      | Known |
| TCF4 | RAB41      | Known |
| TCF4 | RECK       | Known |
| TCF4 | REXO1L6P   | Known |
| TCF4 | RNF138     | Known |
| TCF4 | RSPH14     | Known |
| TCF4 | SCOC       | Known |
| TCF4 | SEC14L4    | Known |
| TCF4 | SLC39A13   | Known |
| TCF4 | SLC4A1AP   | Known |
| TCF4 | SMOC1      | Known |
| TCF4 | SPATC1L    | Known |
| TCF4 | SPG21      | Known |
| TCF4 | STAMBPL1   | Known |
| TCF4 | STK16      | Known |
| TCF4 | STX11      | Known |
| TCF4 | SZT2       | Known |
| TCF4 | TAPBPL     | Known |
| TCF4 | TCF3       | Known |
| TCF4 | TCL1A      | Known |
| TCF4 | TLE1       | Known |
| TCF4 | TMEM213    | Known |
| TCF4 | TP53       | Known |
| TCF4 | TRAPPC2L   | Known |
| TCF4 | TSSC4      | Known |
| TCF4 | TSSK3      | Known |
| TCF4 | TWIST1     | Known |
| TCF4 | TWIST2     | Known |
| TCF4 | TXNL4B     | Known |
| TCF4 | USP4       | Known |
| TCF4 | UTP23      | Known |
| TCF4 | VPS28      | Known |
| TCF4 | XRCC5      | Known |
| TCF4 | ZDHHC24    | Known |
| TCF4 | ZNF124     | Known |
| TCF4 | ZNF205-AS1 | Known |
| TCF4 | ZNF417     | Known |

|          |          |       |
|----------|----------|-------|
| TCF4     | ZNF587   | Known |
| TCL1A    | AKT3     | Known |
| TCP1     | VRK2     | Known |
| TERT     | SMG6     | Known |
| TFIP11   | DISC1    | Known |
| THOP1    | MPP6     | Known |
| TIAM2    | DISC1    | Known |
| TNF      | ADAM9    | Known |
| TNF      | PDIK1L   | Known |
| TNF      | RC3H1    | Known |
| TNF      | RIPK1    | Known |
| TNF      | TNFAIP3  | Known |
| TNF      | TNFRSF1A | Known |
| TNF      | TNFRSF1B | Known |
| TNF      | TRADD    | Known |
| TNF      | TRAF2    | Known |
| TNF      | YWHAQ    | Known |
| TNFAIP1  | CUL3     | Known |
| TNIK     | DISC1    | Known |
| TNKS     | DISC1    | Known |
| TPD52L1  | PAK6     | Known |
| TPM1     | MAD1L1   | Known |
| TPM3     | MAD1L1   | Known |
| TPR      | MAD1L1   | Known |
| TRA2B    | SRPK2    | Known |
| TRAF3IP1 | DISC1    | Known |
| TRAF3IP1 | DTNBP1   | Known |
| TRAF6    | OTUD7B   | Known |
| TRIM2    | DTNBP1   | Known |
| TRIM27   | DTNBP1   | Known |
| TRIM32   | DTNBP1   | Known |
| TRIO     | DISC1    | Known |
| TSC2     | AKT3     | Known |
| TSC22D3  | MAD1L1   | Known |
| TUBB2A   | DISC1    | Known |
| UBC      | AMBRA1   | Known |
| UBC      | HCN1     | Known |
| UBC      | MAD1L1   | Known |
| UBC      | MPHOSPH9 | Known |
| UBC      | OTUD7B   | Known |
| UBE2D1   | CUL3     | Known |
| UBE2D2   | CUL3     | Known |
| UBE2D3   | AMBRA1   | Known |
| UBE2E1   | CUL3     | Known |
| UBE2E2   | CUL3     | Known |
| UBE2S    | OTUD7B   | Known |
| UBTF     | MAD1L1   | Known |



|         |          |       |
|---------|----------|-------|
| UTRN    | DISC1    | Known |
| VHL     | DGKI     | Known |
| VRK2    | CCT2     | Known |
| VRK2    | CCT4     | Known |
| VRK2    | LNX1     | Known |
| VRK2    | MAPK8IP1 | Known |
| VRK2    | MAPK8IP2 | Known |
| VRK2    | RBX1     | Known |
| WNT7B   | CUL3     | Known |
| XPNPEP1 | DISC1    | Known |
| XRCC6   | TCF4     | Known |
| XRN2    | DISC1    | Known |
| YBX1    | SLC6A4   | Known |
| YWHAE   | DISC1    | Known |
| YWHAG   | DISC1    | Known |
| YWHAG   | MPHOSPH9 | Known |
| YWHAQ   | DISC1    | Known |
| YWHAZ   | DISC1    | Known |
| YWHAZ   | MPHOSPH9 | Known |
| ZDHHC17 | OTUD7B   | Known |
| ZDHHC17 | TMTC1    | Known |
| ZNF197  | DISC1    | Known |
| ZNF365  | DISC1    | Known |
| ZNF490  | DTNBP1   | Known |
